# Supplementary material
Source: PubMed Central journal article supplement (PMC2910445)
Supplement: NIHMS209635-supplement-01.pdf [file NIHMS209635-supplement-01.pdf]

# Confirmation of the Structures of Synthetic Derivatives of Migrastatin in the Light of Recently Disclosed Crystallographically Based Claims

*Pavel Nagorny,<sup>†</sup> Isaac Krauss,<sup>@</sup> Lucy Perez,<sup>†</sup> Jón T. Njardarson,<sup>&</sup> Christoph*

*Gaul,<sup>†</sup> Guangli Yang,<sup>#</sup> Ouathek Ouerfelli,<sup>#</sup> Samuel J. Danishefsky<sup>\*,†,‡</sup>*

*<sup>†</sup>Laboratory for Bioorganic Chemistry, Sloan-Kettering Institute for Cancer Research, Laboratory for Bioorganic Chemistry, <sup>#</sup>Organic Synthesis Core Facility, 1275 York Avenue, New York, NY 10065, <sup>@</sup>Department of Chemistry, Brandeis University, 415 South Street, Waltham, MA 02453, <sup>&</sup>Department of Chemistry and Chemical Biology, Baker Laboratory, Cornell University, Ithaca, NY 14853, and <sup>‡</sup>Department of Chemistry, Columbia University, Havemeyer Hall, 3000 Broadway, New York, NY 10027*

## Content:

|                                                    |       |
|----------------------------------------------------|-------|
| General Information ( <b>2</b> and <b>4</b> )..... | 2     |
| 1H NMR Spectra for <b>2</b> .....                  | 3-5   |
| COSY NMR Spectra of <b>2</b> .....                 | 6-8   |
| NOESY NMR Spectra of <b>2</b> .....                | 9-12  |
| 1D NOE Data for <b>2</b> .....                     | 13-15 |
| 1H NMR Spectra for <b>4</b> .....                  | 16-18 |
| COSY NMR Spectra of <b>4</b> .....                 | 19-20 |
| NOESY NMR Spectra of <b>4</b> .....                | 21-23 |
| 1D NOE Data for <b>4</b> .....                     | 24-25 |
| Crystallographic Data for <b>4</b> .....           | 26-32 |

<sup>1</sup>H-, COSY and NOESY NMR spectra for migrastatin ketone **2** and migrastatin ether **4** were recorded on a Bruker DRX-600 spectrometer. Chemical shifts (δ-values) are reported in ppm with residual undeuterated CHCl<sub>3</sub> as the internal standard (referenced to 7.26 ppm for H-NMR) for migrastatin ether **4** and with residual undeuterated benzene as the internal standard (referenced to 7.16 ppm for H-NMR) for migrastatin ketone **2**. Coupling constants (J) (H,H) are given in Hz, spectral splitting patterns are designated as singlet (s), doublet (d), triplet (t), quadruplet (q), multiplet or more overlapping signals (m), apparent (app), broad signal (br). 1D NOE data was extracted from the corresponding 2D NOESY spectra.

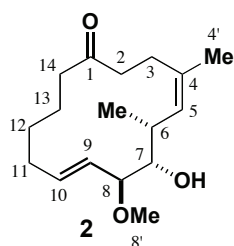

Migrastatin Ketone (**2**).<sup>1</sup> <sup>1</sup>H NMR (C<sub>6</sub>D<sub>6</sub>, 600 MHz): δ 5.70 (dq, 1H, *J* = 10.1, 1.3 Hz, C<sub>5</sub>H), 5.35 (ddd, 1H, *J* = 15.2, 8.1, 6.5 Hz, C<sub>10</sub>H), 5.04 (ddt, 1H, *J* = 15.6, 7.6, 1.1 Hz, C<sub>9</sub>H), 3.46 (dd, 1H, *J* = 9.2, 1.3 Hz, C<sub>7</sub>H), 3.36 (t, 1H, *J* = 7.9 Hz, C<sub>8</sub>H), 3.04 (s, 3H, C<sub>8</sub>OCH<sub>3</sub>), 2.27 (bs, 1H, C<sub>7</sub>OH), 2.43 (dq, 1H, *J* = 9.8, 6.8, 1.0 Hz, C<sub>6</sub>H), 2.16-2.03 (m, 5H, C<sub>2</sub>H<sub>2</sub>, C<sub>3</sub>H<sub>2</sub>, C<sub>14</sub>H), 1.93 (ddd, 1H, *J* = 13.7, 10.4, 6.2 Hz, C<sub>14</sub>H), 1.84-1.82 (m, 1H, C<sub>11</sub>H), 1.80-1.74 (m, 1H, C<sub>11</sub>H), 1.58 (d, 3H, *J* = 1.3 Hz, C<sub>4</sub>CH<sub>3</sub>), 1.47-1.37 (m, 1H, C<sub>13</sub>H), 1.37-1.25 (m, 1H, C<sub>13</sub>H), 1.12 (d, 3H, *J* = 6.8 Hz, C<sub>6</sub>CH<sub>3</sub>), 1.11-1.07 (m, 2H, C<sub>12</sub>H<sub>2</sub>).

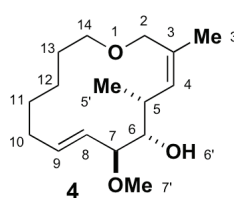

Migrastatin Ether (**4**).<sup>2</sup> <sup>1</sup>H NMR (CDCl<sub>3</sub>, 600 MHz): δ 5.63 (ddd, 1H, *J* = 15.1, 9.3, 5.1 Hz, C<sub>9</sub>H), 5.61 (dd, 1H, *J* = 8.9, 1.2 Hz, C<sub>4</sub>H), 5.22 (dd, 1H, *J* = 7.9, 15.5 Hz, C<sub>8</sub>H), 3.76 (s, 2H, C<sub>2</sub>H<sub>2</sub>), 3.56-3.52 (m, 1H, C<sub>14</sub>H), 3.49-3.44 (m, 1H, C<sub>14</sub>H), 3.44-3.40 (m, 2H, C<sub>6</sub>H, C<sub>7</sub>H), 3.30 (s, 3H, C<sub>7</sub>OCH<sub>3</sub>), 2.93 (dq, 1H, *J* = 9.9, 6.9, 0.9 Hz, C<sub>5</sub>H), 2.73 (br s, 1H, C<sub>6</sub>OH), 2.24 (m, 1H, C<sub>10</sub>H), 2.09 (m, 1H, C<sub>10</sub>H), 1.76 (d, 3H, *J* = 1.2 Hz, C<sub>3</sub>CH<sub>3</sub>), 1.66 (m, 1H, C<sub>13</sub>H), 1.53 (m, 1H, C<sub>11</sub>H), 1.45-1.36 (m, 4H, C<sub>11</sub>H, C<sub>10</sub>H<sub>2</sub>, C<sub>13</sub>H), 0.94 (d, 3H, *J* = 6.9 Hz, C<sub>5</sub>CH<sub>3</sub>). Crystallized by slow evaporation from *i*-PrOH/H<sub>2</sub>O/Acetone or from Acetone/Hexanes/MeOH/H<sub>2</sub>O at -20 °C.

<sup>1</sup> For the full experimental procedures and characterization data for the preparation of **2** refer to: Gaul, C.; Njardarson, J. T.; Shan, D.; Dorn, D. C.; Wu, K.-D.; Tong, W. P.; Huang, X.-Y.; Moore, M. A. S.; Danishefsky, S. J. *J. Am. Chem. Soc.* **2004**, *126*(36), 11326-11337.

<sup>2</sup> For the full experimental procedures and characterization data for the preparation of **4** refer to: Oskarsson, T.; Nagorny, P.; Krauss, I. J.; Perez, L.; Mandal, M.; Yang, G.; Ouerfelli, O.; Xiao, D.; Moore, M. S. A.; Massague, J.; Danishefsky, S. J. *J. Am. Chem. Soc.* **2010**, *132*(9), 3224-3228.

\* nagornyp\_Migrastatin\_Ketone\_Benzene (10 1) C6D6 24.0C April\_17\_2010\_12:11:46 Bruker AVIII 600MHz RRL1326: janggunum zg30 : 1H 7.500 ppm \*

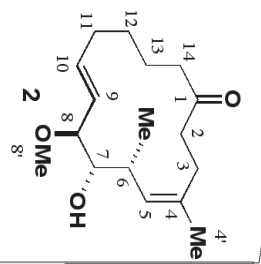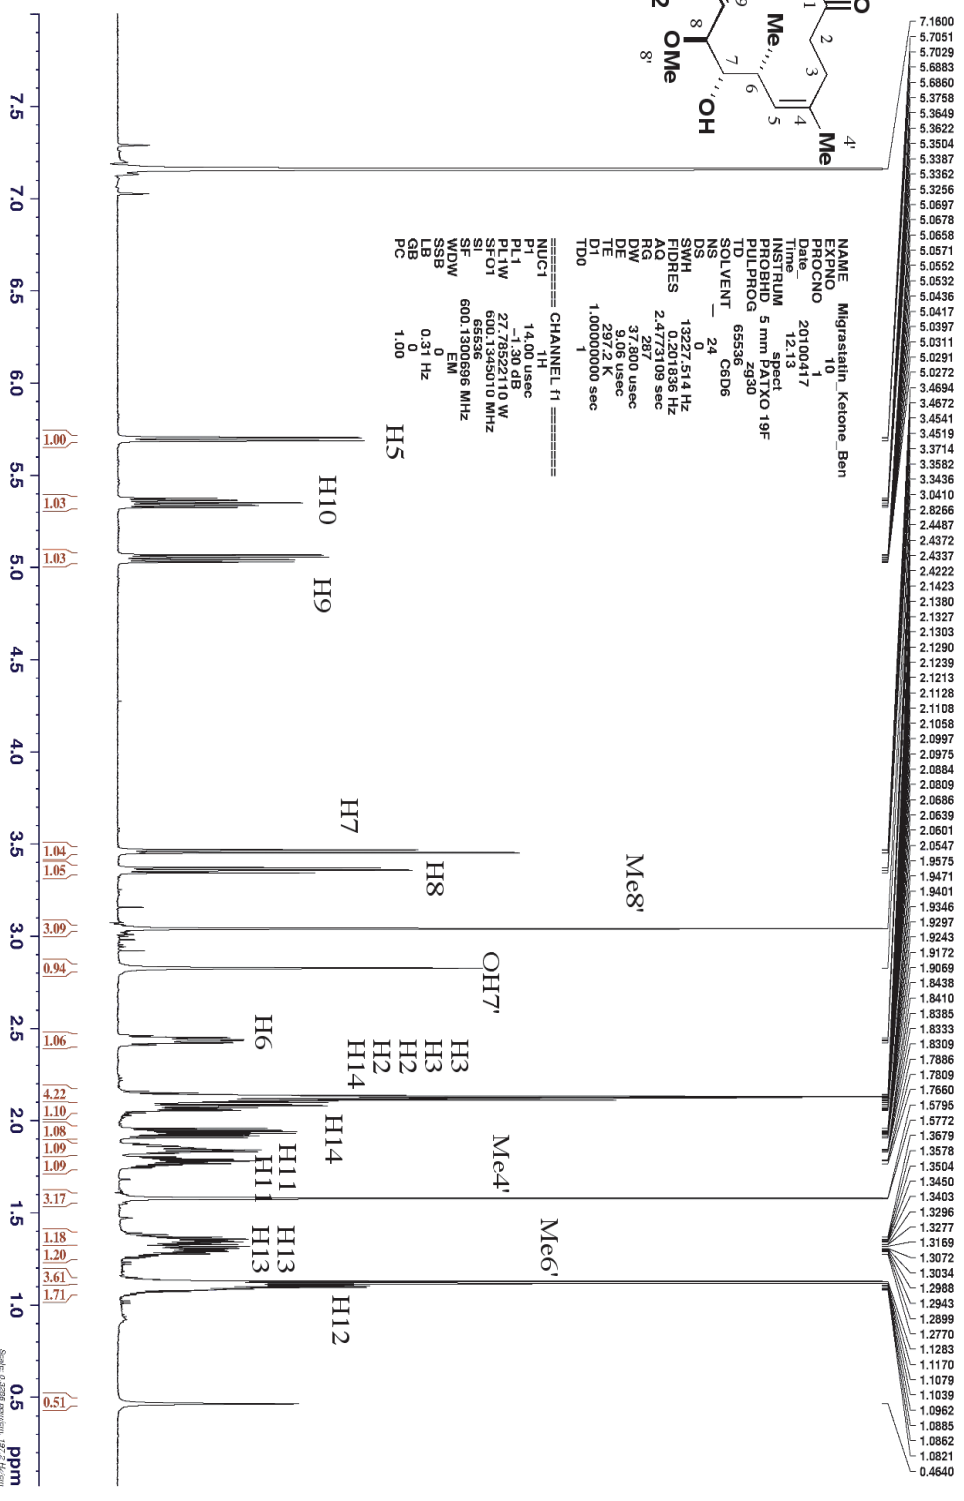

\*: nagornyy Migrastatin\_Ketone\_Benzene (10 1) C6D6 24.0C April\_17\_2010\_12:11:46 Bruker AVIII 600MHz RRL1326: janggeum zg30 : 1H 7.500 ppm \*

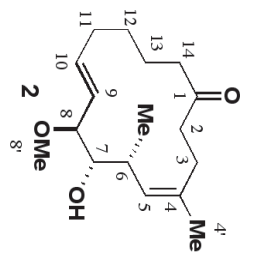

5.7051  
5.7029  
5.6883  
5.6860  
5.3758  
5.3649  
5.3622  
5.3504  
5.3387  
5.3362  
5.3256  
5.0697  
5.0678  
5.0658  
5.0571  
5.0552  
5.0532  
5.0436  
5.0417  
5.0397  
5.0311  
5.0291  
5.0272

```

NAME      Migrastatin_Ketone_Ben
EXPNO     10
PROCNO    1
Date_     20100417
Time      12.00
INSTRUM   spect
PROBHD    5 mm PATXO 19F
PULPROG   zg30
TD        65536
SOLVENT   C6D6
NS        24
DS        0
SWH       13227.514 Hz
FIDRES    0.201836 Hz
AQ        2.4723109 sec
RG        372
DE        37.800 usec
TE        297.2 K
TD0       1.00000000 sec
===== CHANNEL f1 =====
NUC1      1H
P1        14.00 usec
PL1       0.00 dB
PL2       27.76 dB
PL3       0.00 dB
PL4       0.00 dB
SFO1      600.1345010 MHz
SI        65536
SF        600.1300696 MHz
WDW       EM
SSB       0
LB        0.31 Hz
GB        0
PC        1.00
  
```

3.4694  
3.4672  
3.4541  
3.4519  
3.3714  
3.3682  
3.3436  
3.1564  
3.0743  
3.0642  
3.0627  
3.0607  
3.0573  
3.0520  
3.0499  
3.0492  
3.0410  
3.0281  
3.0260  
3.0234  
3.0201  
3.0166  
3.0087  
3.0005  
2.9981  
2.9804  
2.9529

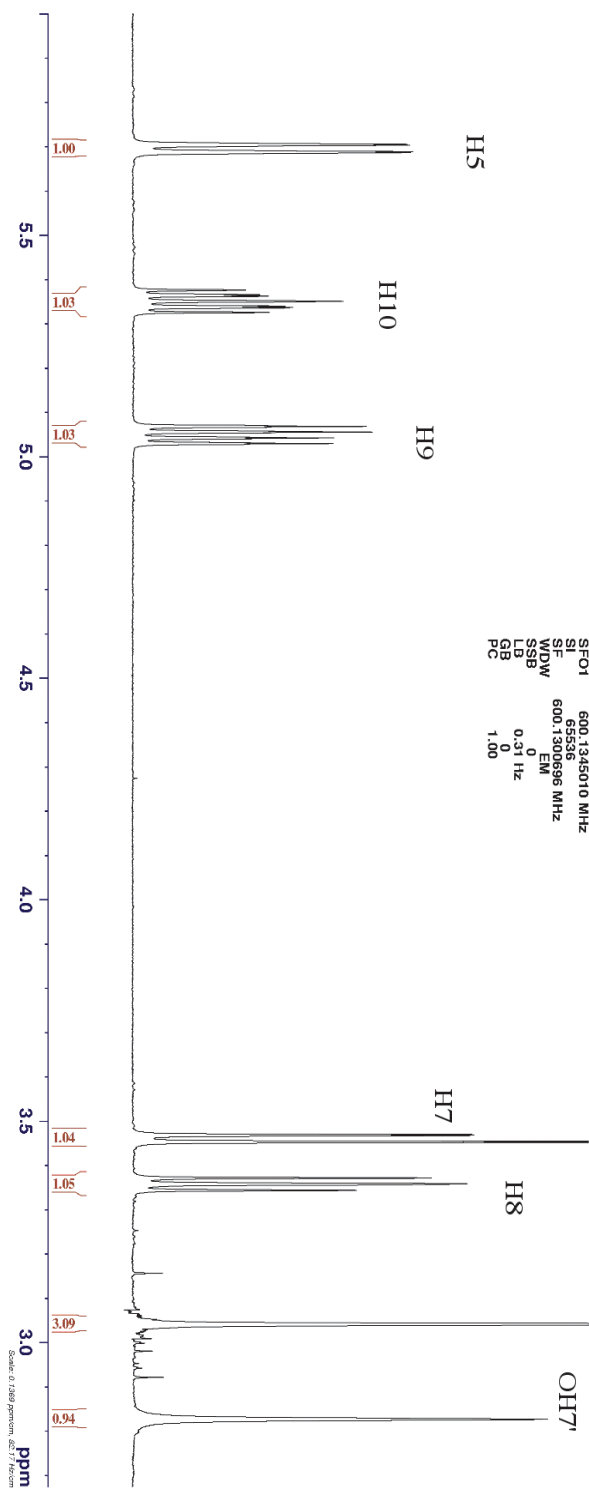

\* nagornyp\_Migrastatin\_Ketone\_Benzene (10 1) C6D6 24.0C April\_17\_2010\_12:11:46 Bruker AVIII 600MHz RRL1326; janggeum zg30 : 1H 7.500 ppm \*

2.4602  
2.4487  
2.4372  
2.4337  
2.4222  
2.4106  
2.4148  
2.4123  
2.4138  
2.4137  
2.4103  
2.4129  
2.4129  
2.1239  
2.1213  
2.1128  
2.1108  
2.1058  
2.0977  
2.0875  
2.0884  
2.0809  
2.0732  
2.0686  
2.0639  
2.0601  
2.0547  
1.9575  
1.9471  
1.9401  
1.9346  
1.9297  
1.9245  
1.9172  
1.9069  
1.8675  
1.8641  
1.8616  
1.8566  
1.8543  
1.8511  
1.8438  
1.8410  
1.8385  
1.8333  
1.8309  
1.8280  
1.8228  
1.8206  
1.8029  
1.7950  
1.7886  
1.7809  
1.7738  
1.7660  
1.7583  
1.7508  
1.5795  
1.5772  
1.3805  
1.3779  
1.3679  
1.3630  
1.3578  
1.3553  
1.3504  
1.3477  
1.3450  
1.3403  
1.3378  
1.3350  
1.3296  
1.3277  
1.3203  
1.3169  
1.3122  
1.3072  
1.3024  
1.2988  
1.2943  
1.2899  
1.2859  
1.2806  
1.2770  
1.2719  
1.2672  
1.1378  
1.1283  
1.1170  
1.1079  
1.1039  
1.0962  
1.0885  
1.0862  
1.0821  
1.0794  
1.0722

NAME Migrastatin\_Ketone\_Ben  
EXPNO 10  
PROCNO 1  
Date\_ 20100417  
Time 12.13  
INSTRUM spect  
PROBHD 5 mm PAXO 19F  
TD 2830  
SOLVENT C6D6  
NS 24  
DS 0  
SWH 19227.514 Hz  
SFO1 277.013 MHz  
AQ 2.4773109 sec  
RG 287  
DW 37.800 usec  
DE 9.08 usec  
TE 297.2 K  
D 1.0000000 sec  
TDO 1

===== CHANNEL f1 =====  
NUC1 1H  
M 14.00  
PL1 -1.30 dB  
SFO1 27.78522110 MHz  
SE 653536  
WDW EM  
SSB 0  
LB 0.31 Hz  
GB 0  
PC 1.00

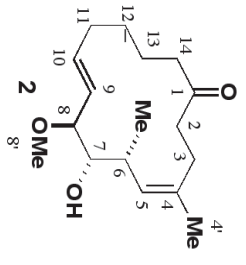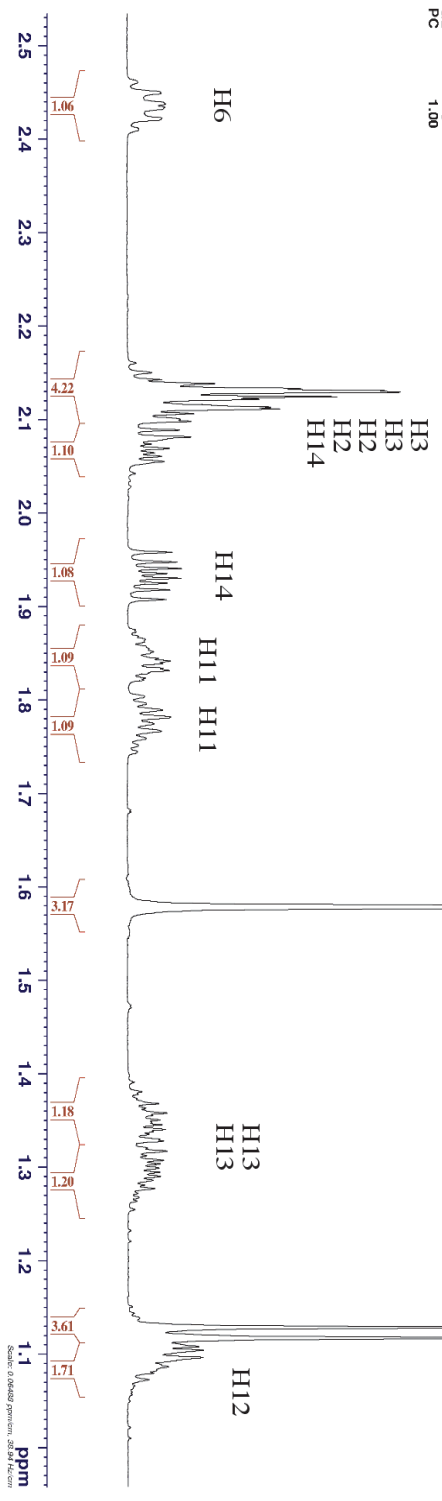

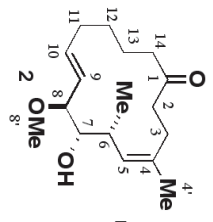

n\_Ketone\_Benzene (11 1) C6D6 24.0C April 17,2010\_12:13:53 Bruker AVIII 600MHz RRL1326: jangeum cosy

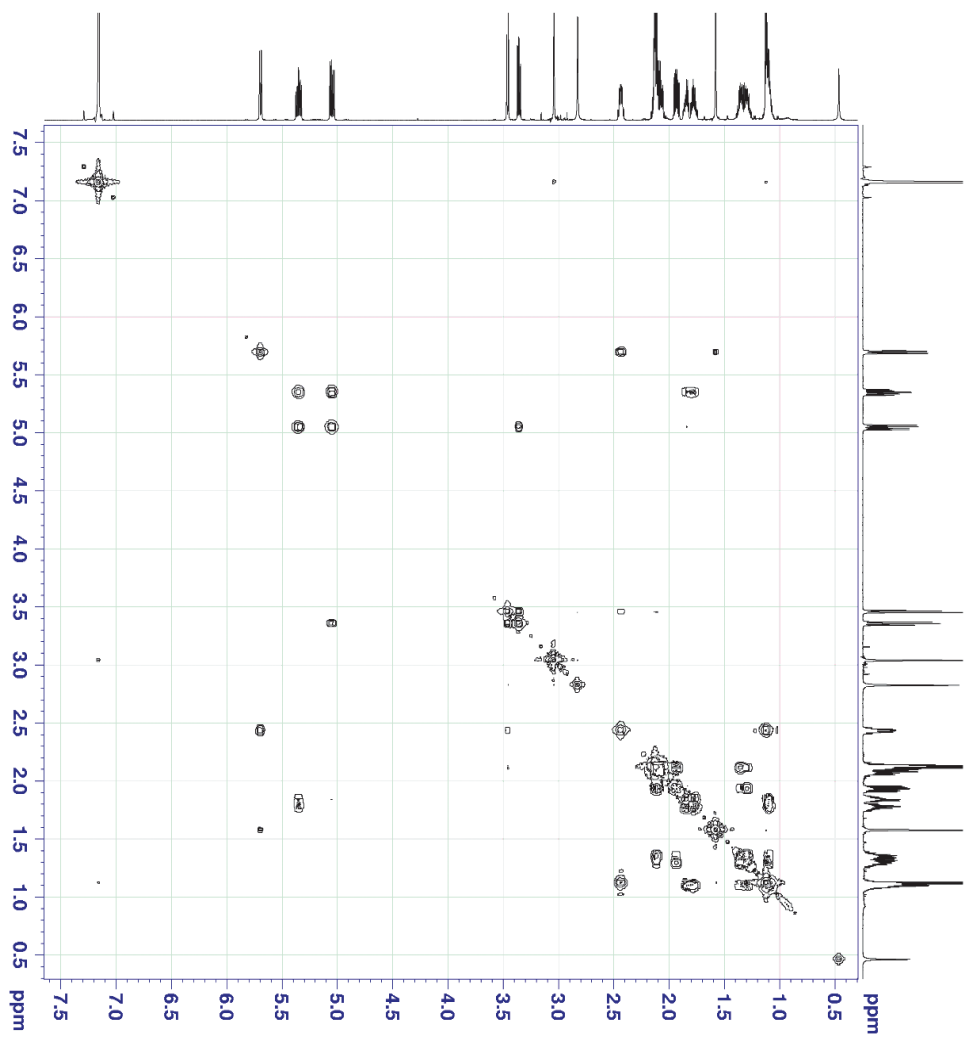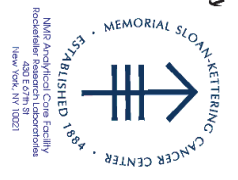

NMR Analytical Core Facility  
 Rockefeller University  
 1230 York Ave  
 Box 247  
 New York, NY 10021

```

NAME: Ketone (11 1) C6D6
EXPNO: 1
PROCNO: 1
PROCPS: 1
F2 - F1: 201.96641
SOLVENT: DMSO
INSTRUM: spect
PROBHD: 5 mm BBOVOY 2H
PULPROG: zgpg30
AQ: 0.02000000
RG: 327.000000
SFOCUS: 6
SI: 655
SF: 600.1324499 MHz
NUC1: 13C
NUC2: 13C
NUC3: 13C
NUC4: 13C
NUC5: 13C
NUC6: 13C
NUC7: 13C
NUC8: 13C
NUC9: 13C
NUC10: 13C
NUC11: 13C
NUC12: 13C
NUC13: 13C
NUC14: 13C
NUC15: 13C
NUC16: 13C
NUC17: 13C
NUC18: 13C
NUC19: 13C
NUC20: 13C
NUC21: 13C
NUC22: 13C
NUC23: 13C
NUC24: 13C
NUC25: 13C
NUC26: 13C
NUC27: 13C
NUC28: 13C
NUC29: 13C
NUC30: 13C
NUC31: 13C
NUC32: 13C
NUC33: 13C
NUC34: 13C
NUC35: 13C
NUC36: 13C
NUC37: 13C
NUC38: 13C
NUC39: 13C
NUC40: 13C
NUC41: 13C
NUC42: 13C
NUC43: 13C
NUC44: 13C
NUC45: 13C
NUC46: 13C
NUC47: 13C
NUC48: 13C
NUC49: 13C
NUC50: 13C
NUC51: 13C
NUC52: 13C
NUC53: 13C
NUC54: 13C
NUC55: 13C
NUC56: 13C
NUC57: 13C
NUC58: 13C
NUC59: 13C
NUC60: 13C
NUC61: 13C
NUC62: 13C
NUC63: 13C
NUC64: 13C
NUC65: 13C
NUC66: 13C
NUC67: 13C
NUC68: 13C
NUC69: 13C
NUC70: 13C
NUC71: 13C
NUC72: 13C
NUC73: 13C
NUC74: 13C
NUC75: 13C
NUC76: 13C
NUC77: 13C
NUC78: 13C
NUC79: 13C
NUC80: 13C
NUC81: 13C
NUC82: 13C
NUC83: 13C
NUC84: 13C
NUC85: 13C
NUC86: 13C
NUC87: 13C
NUC88: 13C
NUC89: 13C
NUC90: 13C
NUC91: 13C
NUC92: 13C
NUC93: 13C
NUC94: 13C
NUC95: 13C
NUC96: 13C
NUC97: 13C
NUC98: 13C
NUC99: 13C
NUC100: 13C

```







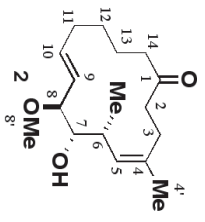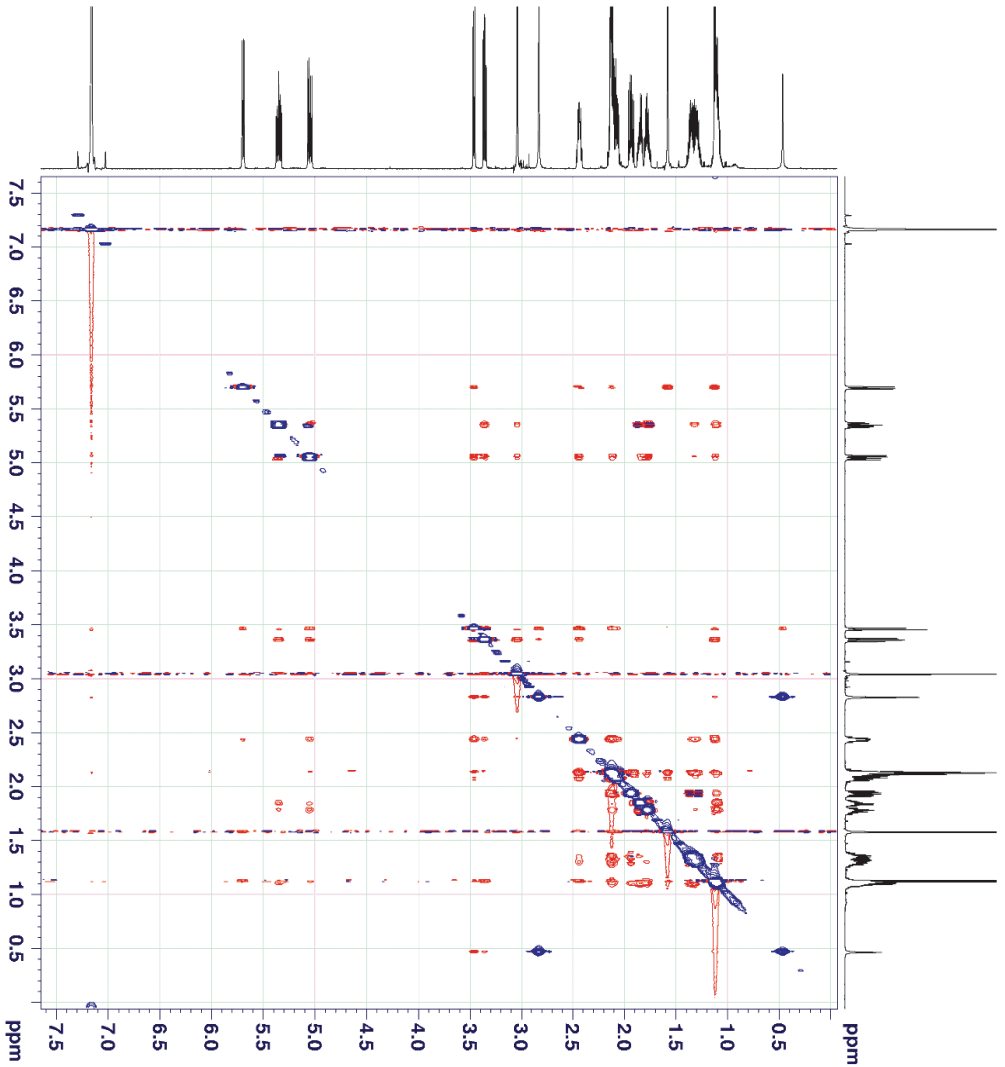

NAME Mifegestrol\_Ketone\_Benzene  
 EXPNO 12  
 PROCNO 1  
 Date\_ 20100417  
 Time 12.37  
 INSTRUM spect  
 PULPROG 5 mm P1XTO 19F  
 TD 65536  
 SOLVENT 2048 CDCl3  
 NS 20  
 DS 16  
 SWH 4629.629 Hz  
 FIDRES 2.260561 Hz  
 AQ 0.2212340 sec  
 DQ 1.085000 usec  
 DE 6.00 usec  
 TE 297.2 K  
 D0 0.00000017 sec  
 D1 1.94593233 sec  
 D8 0.80000001 sec  
 D16 0.00020000 sec  
 INO 0.00021600 sec  
 CHANNEL f1  
 NUC1 1H  
 P1 14.00 usec  
 P2 28.00 usec  
 PL1 -1.30 dB  
 PL1W 27.78522110 W  
 SFO1 600.1323439 MHz  
 GRADIENT CHANNEL  
 GPNAM1 SINE.100  
 GPNAM2 SINE.100  
 GPZ1 40.00 %  
 GPZ2 -40.00 %  
 P16 1000.00 usec  
 ND0 1  
 TD 256  
 SFO1 600.1306993 MHz  
 FIDRES 0.00134490 Hz  
 SW 7.714 ppm  
 ENMORDE States-TPPI  
 SI 1024  
 SF 600.1300669 MHz  
 VDPW QSIINE  
 SSB 2  
 LB 0.00 Hz  
 LB 0  
 LB 1.00  
 SI 1024  
 SF 600.1300678 MHz  
 VDPW QSIINE  
 SSB 2  
 LB 0.00 Hz  
 LB 0

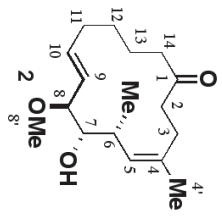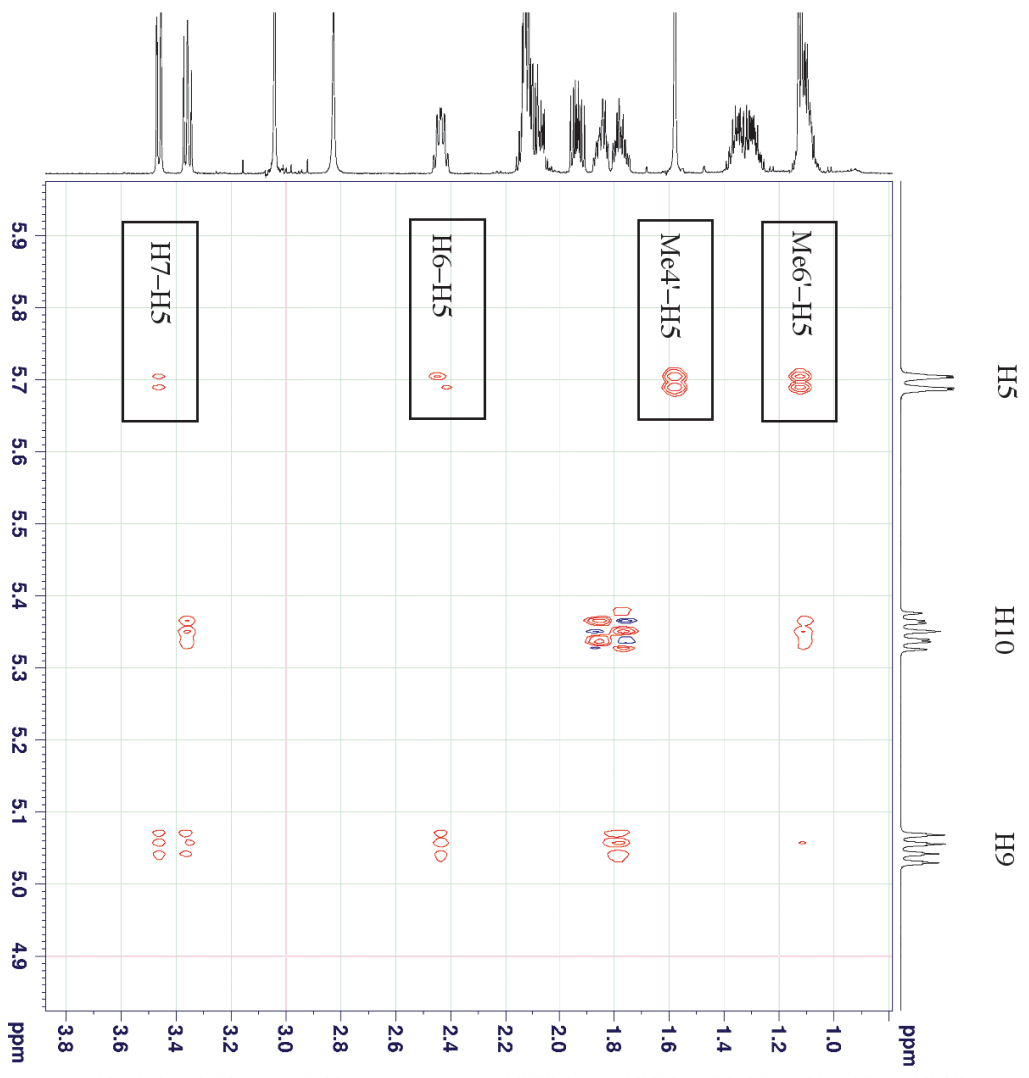

NAME Mignastatin Ketone Benzene  
 EXPNO 12  
 PROCNO 1  
 Date\_ 20100417  
 Time 12.37  
 INSTRUM spect  
 PULPROG 5 mm P1TXO 19F  
 TD 2048  
 SOLVENT 20  
 NS 16  
 DS 16  
 SWH 4629.629 Hz  
 FIDRES 2.260561 Hz  
 AQ 0.2212340 sec  
 RG 128  
 DVM 108.000 usec  
 DE 6.00 usec  
 TE 297.2 K  
 D0 0.00009017 sec  
 D1 1.94593203 sec  
 D8 0.80000001 sec  
 D16 0.00021600 sec  
 INO 0.00021600 sec  
 CHANNEL f1  
 =====  
 NUC1 1H  
 P1 14.00 usec  
 P2 28.00 usec  
 PL1 -1.30 dB  
 PL1W 27.78522110 W  
 SFO1 600.132439 MHz  
 =====  
 GRADIENT CHANNEL =====  
 GPNAM1 SINE.100  
 GPNAM2 SINE.100  
 CPZ1 40.00 %  
 CPZ2 -40.00 %  
 P16 1000.00 usec  
 ND0 1  
 ND 256  
 SFO1 600.1323 MHz  
 RF0ES 808.4490 Hz  
 SW 770.4490 Hz  
 ENMODF Slides-TPTT  
 ST 1024  
 SF 600.1300669 MHz  
 VDW QSINE  
 SSB 2  
 LB 0.00 Hz  
 GB 0  
 PC 1.00  
 ST 1024  
 MC2 Slides-TPTT  
 SF 600.1300678 MHz  
 VDW QSINE  
 SSB 2  
 LB 0.00 Hz  
 GB 0

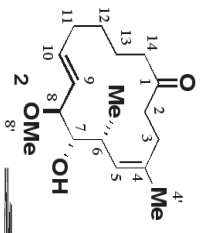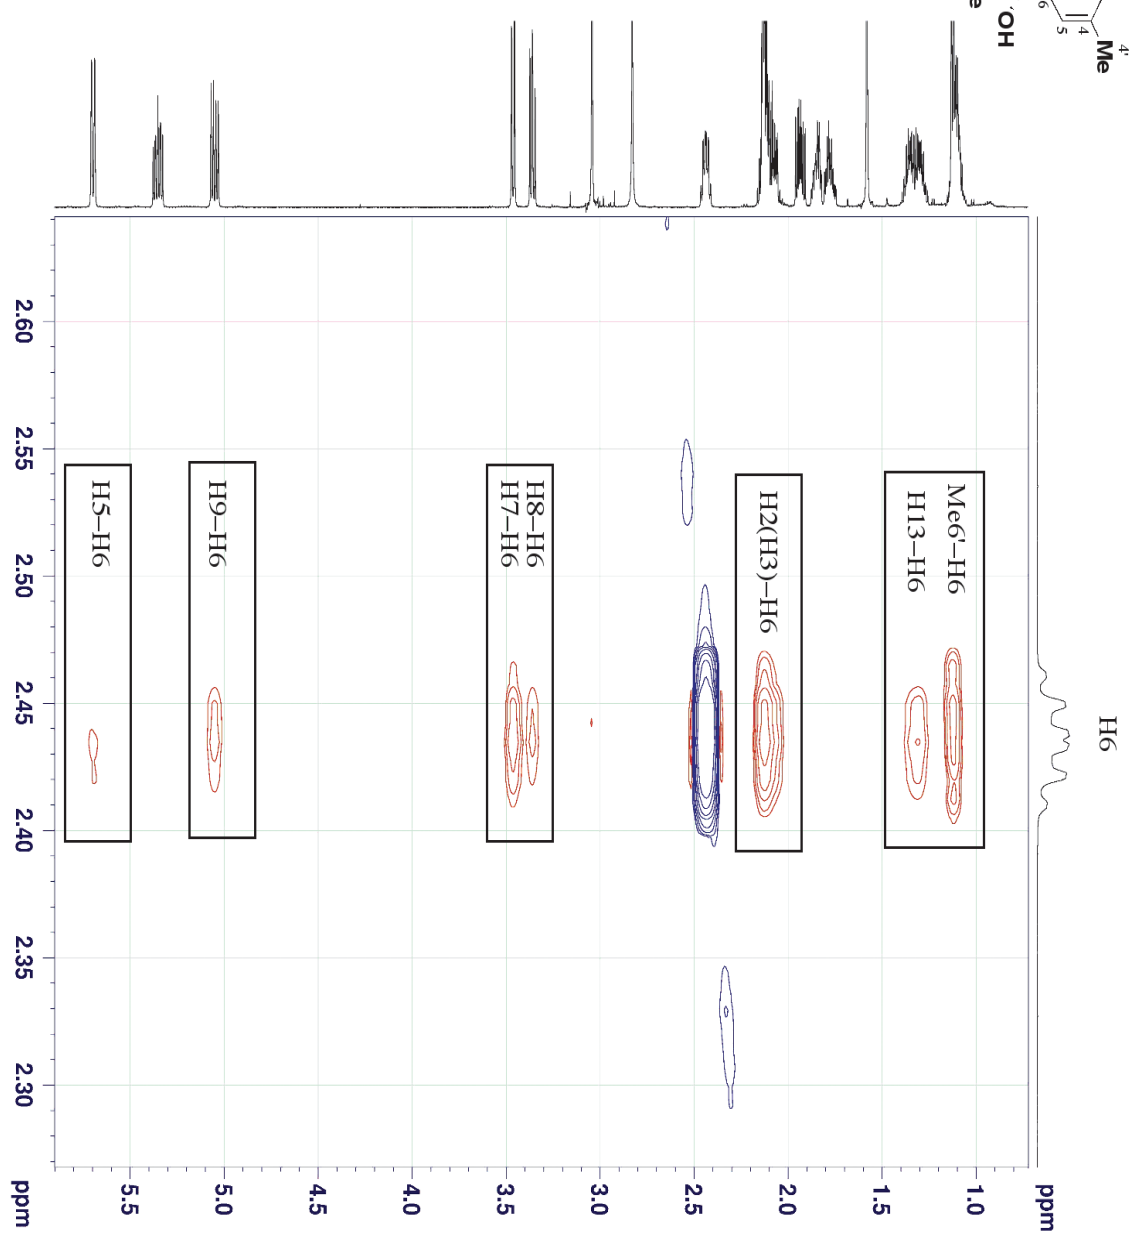

NAME Migrastatin\_Ketone\_Benzene  
 EXPNO 12  
 PROCNO 1  
 Date\_ 20100417  
 Time 12:37  
 INSTRUM spect  
 PULPROG noesygpph  
 TD 2048  
 SOLVENT C6D6  
 NS 20  
 DS 16  
 SWH 4629.629 Hz  
 FIDRES 2.260561 Hz  
 AQ 0.2212340 sec  
 RG 128  
 DW 108.000 usec  
 DE 6.00 usec  
 TE 297.2 K  
 D0 0.000009017 sec  
 D1 1.94593203 sec  
 D8 0.800000001 sec  
 D16 0.000200000 sec  
 IN0 0.000216000 sec

===== CHANNEL f1 =====  
 NUC1 1H  
 P1 14.00 usec  
 P2 28.00 usec  
 PL1 -1.30 dB  
 PL1W 27.78522110 W  
 SFO1 600.1323439 MHz

===== GRADIENT CHANNEL =====  
 GPNAM1 SINE.100  
 GPNAM2 SINE.100  
 GPZ1 40.00 %  
 GPZ2 -40.00 %  
 P16 1000.000 usec  
 ND0 1  
 TD 256  
 SFO1 600.1323 MHz  
 FIDRES 18.084490 Hz  
 SW 7.714 ppm  
 RMNMODE States-TPPI  
 SI 1024  
 SF 600.1300669 MHz  
 WDW QSINE  
 SSB 2  
 LB 0.00 Hz  
 GB 0  
 PC 1.00  
 SI 1024  
 MC2 States-TPPI  
 SR 600.1300678 MHz  
 WDW QSINE  
 SSB 2  
 LB 0.00 Hz  
 GB 0

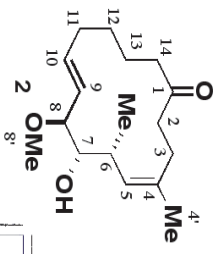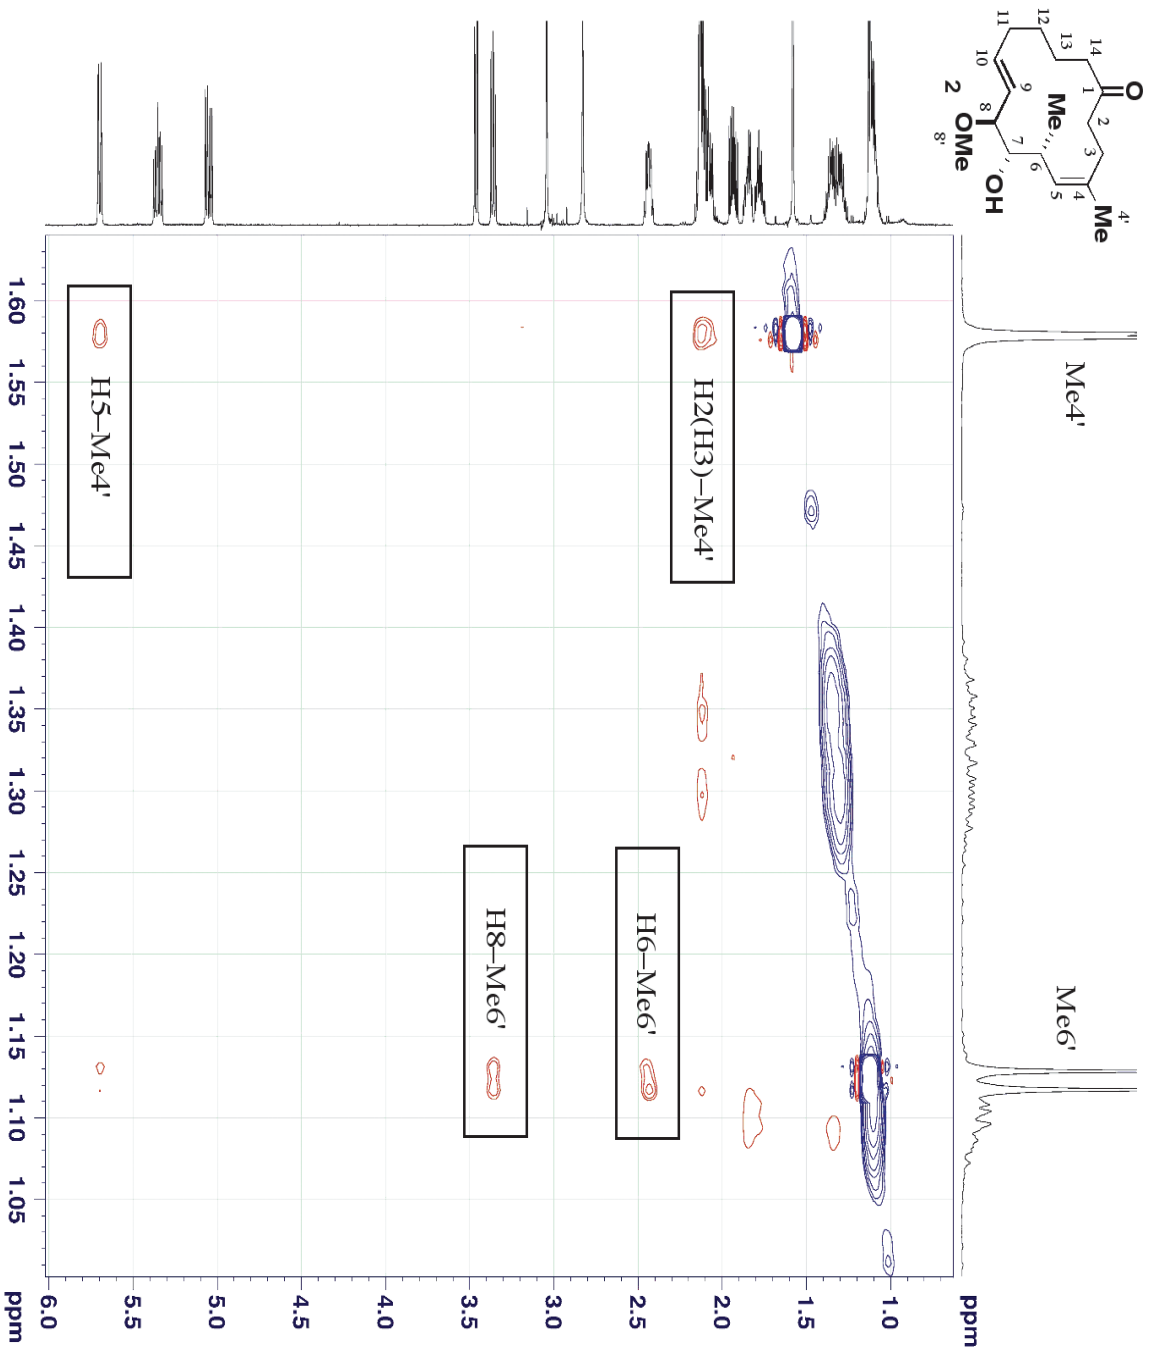

```

NAME Mibrastatin_Ketone_Benzene
EXPNO 12
PROCNO 1
Date_ 20100417
Time 12.37
INSTRUM spect
PROBHD 5 mm PATXO 19F
PULPROG moesygpph
TD 2048
SOLVENT CDCl3
NS 20
DS 16
SWH 4629.629 Hz
FIDRES 2.2260861 Hz
AQ 0.2212340 sec
RG 128
AG 108.000 usec
DE 6.00 usec
TE 297.2 K
D0 0.00009017 sec
D1 1.94893203 sec
D8 0.80000001 sec
D16 0.00020000 sec
IN0 0.00021600 sec

===== CHANNEL f1 =====
NUC1 1H
P1 14.00 usec
P2 28.00 usec
PL1 -1.30 dB
PL1W 27.78522110 W
SFO1 600.1323439 MHz

===== GRADIENT CHANNEL =====
GPNAM1 SINE.100
GPNAM2 SINE.100
GPZ1 40.00 %
GPZ2 -40.00 %
P16 1000.000 usec
ND0 1
TD 256
SFO1 600.1323 MHz
FIDRES 18.084490 Hz
SW 7.714 ppm
FmMODE States-TPPI
SI 1024
SF 600.1300669 MHz
WDW QSINE
SSB 2
GB 0.00 Hz
PC 1.00
SI 1024
SF 600.1300678 MHz
WDW QSINE
SSB 2
GB 0.00 Hz

```

1D NOE Data Obtained from 2D NOESY of migrastatin ketone (2) recorded in benzene.  
Correlations for the H5 olefin.

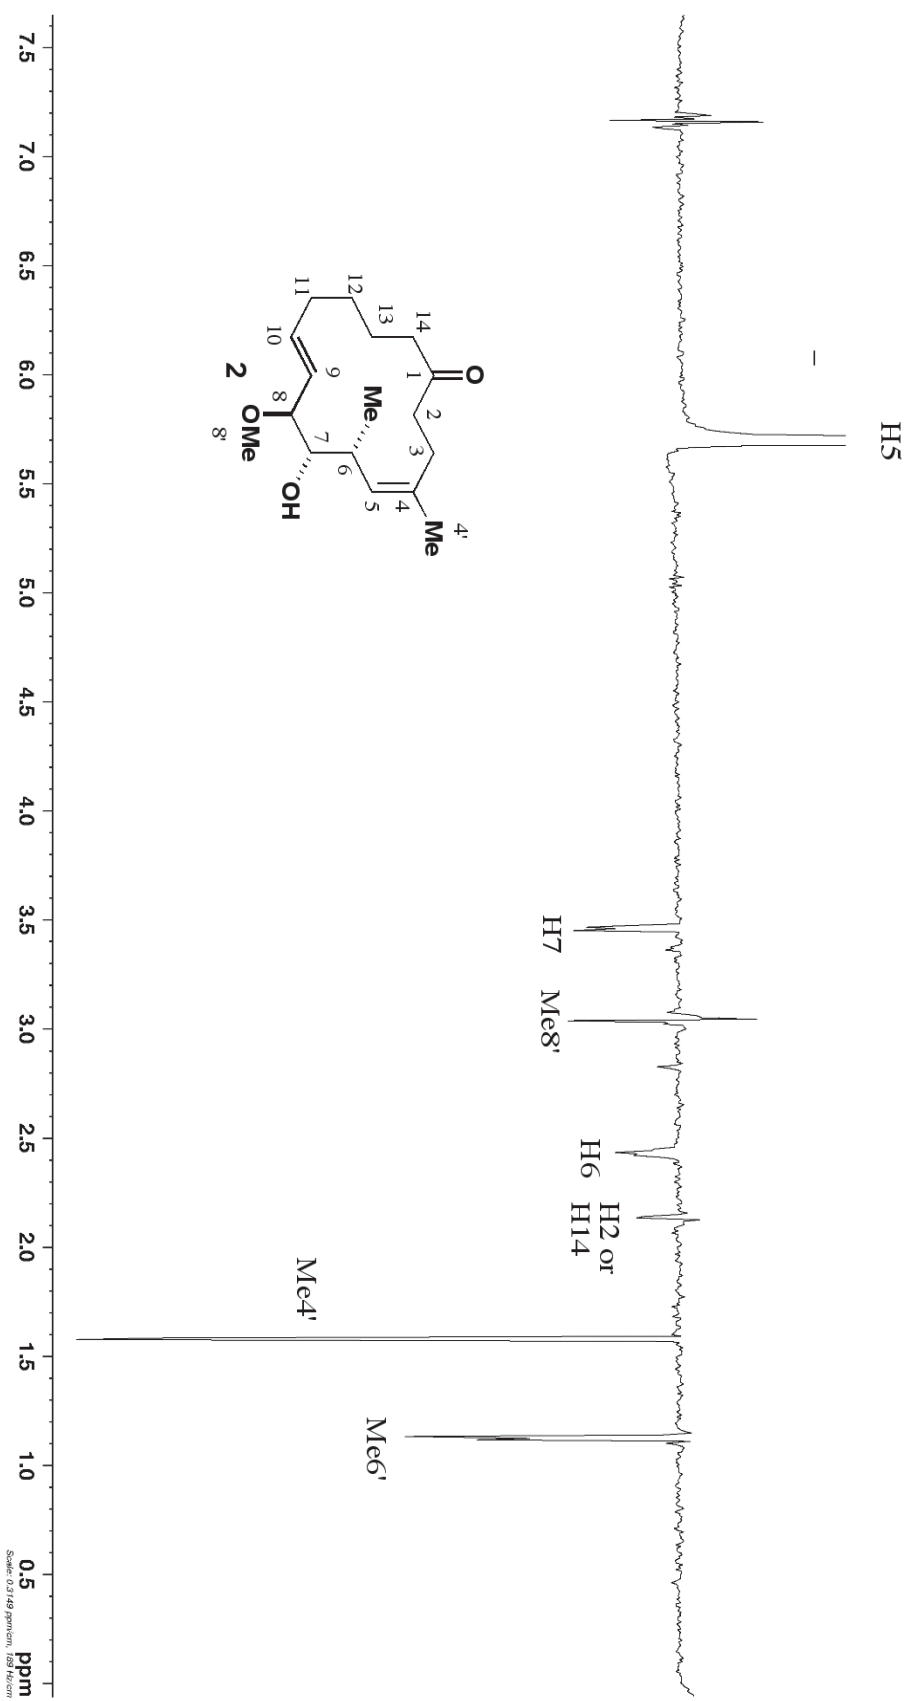

1D NOE Data Extracted from 2D NOESY Spectrum of Migrastatin Ketone (2) recorded in benz  
Correlations for H5

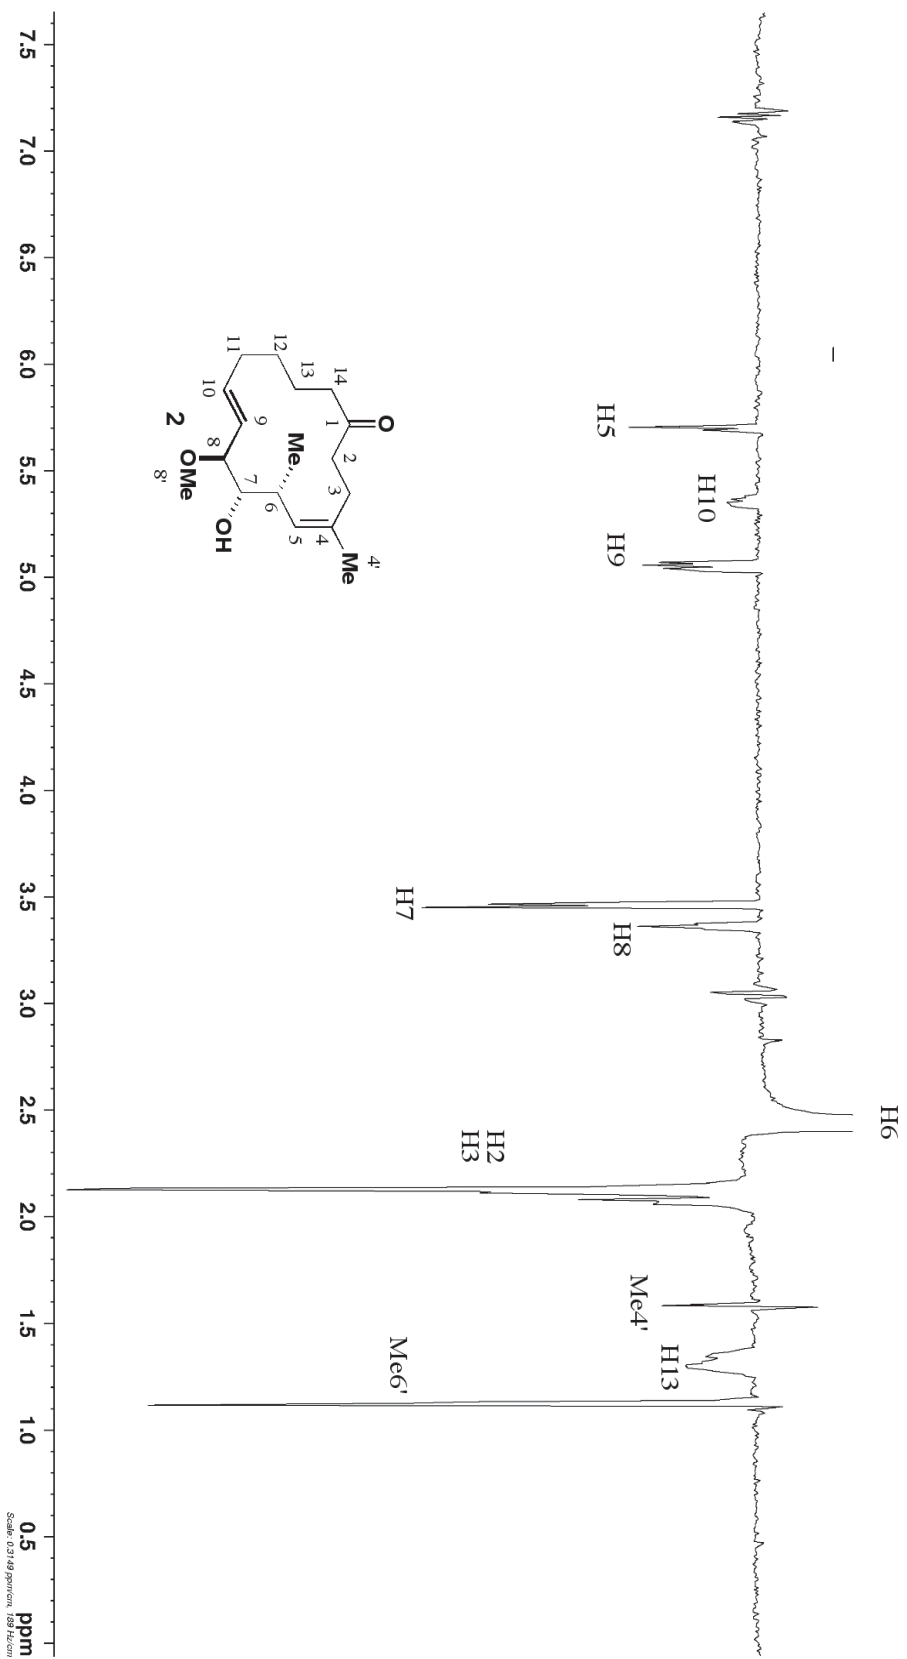

1D NOE data extracted from 2D NOESY spectrum for migrastatin ketone (2) in benzene. The correlations for the Me<sup>4'</sup> of the C4-C5 olefin.

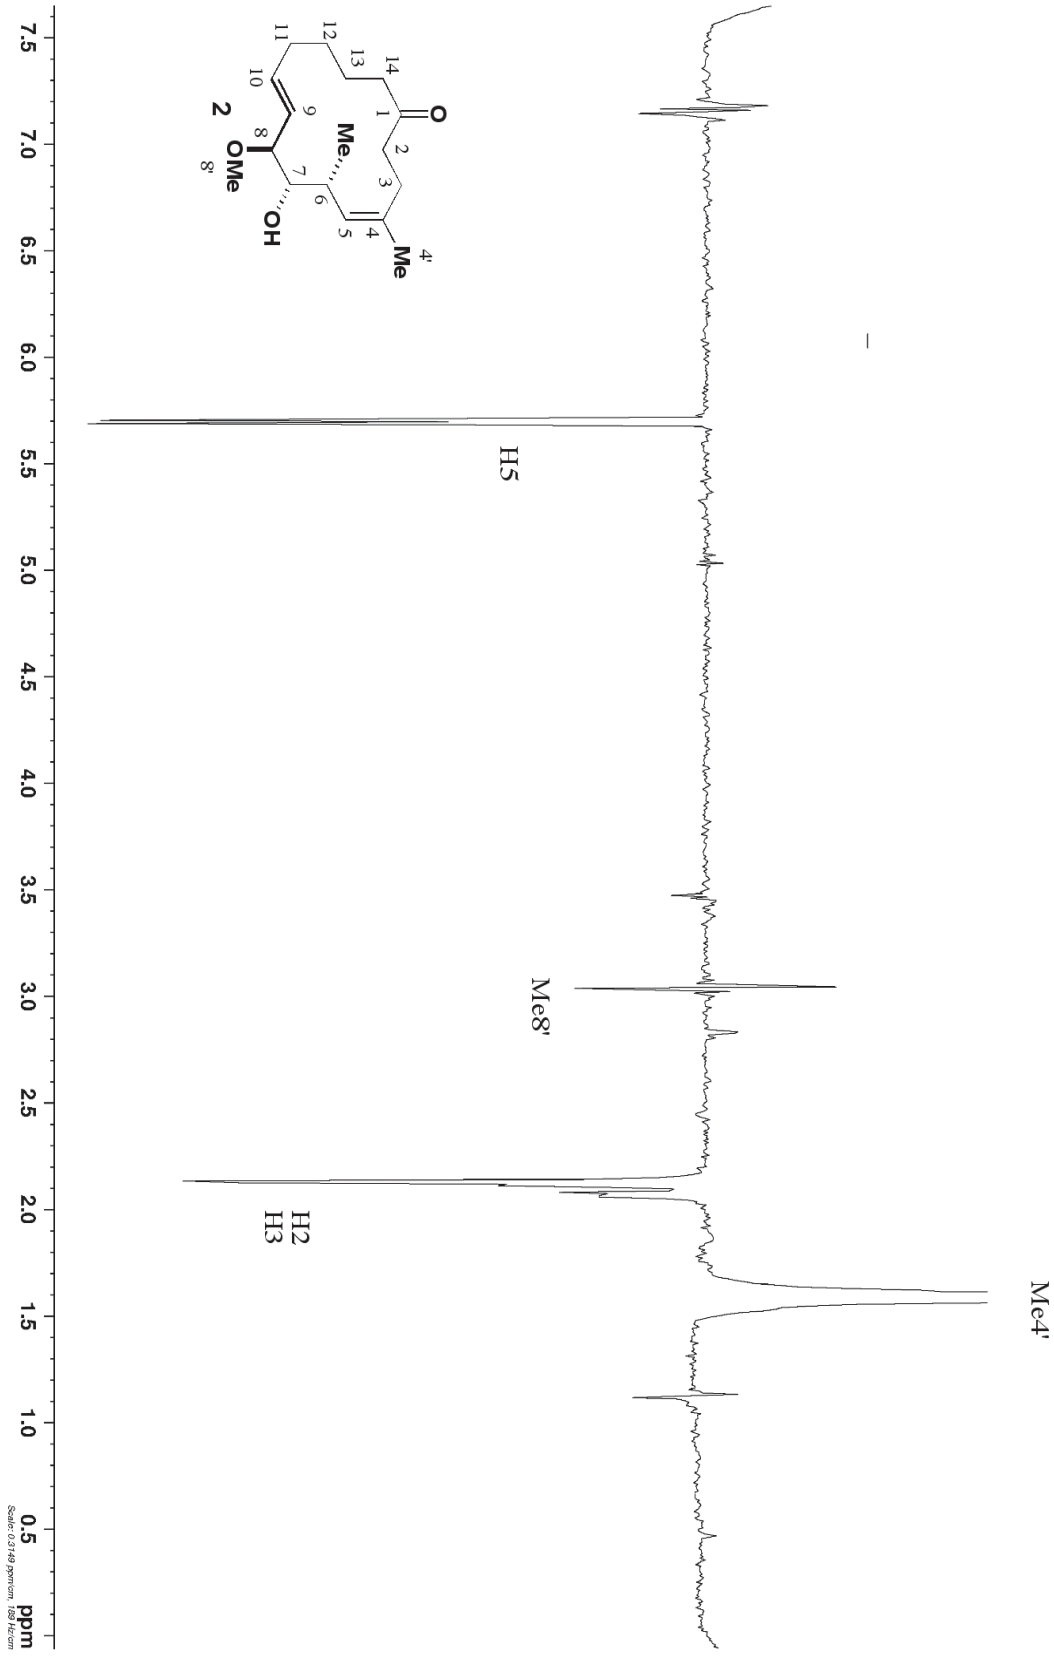

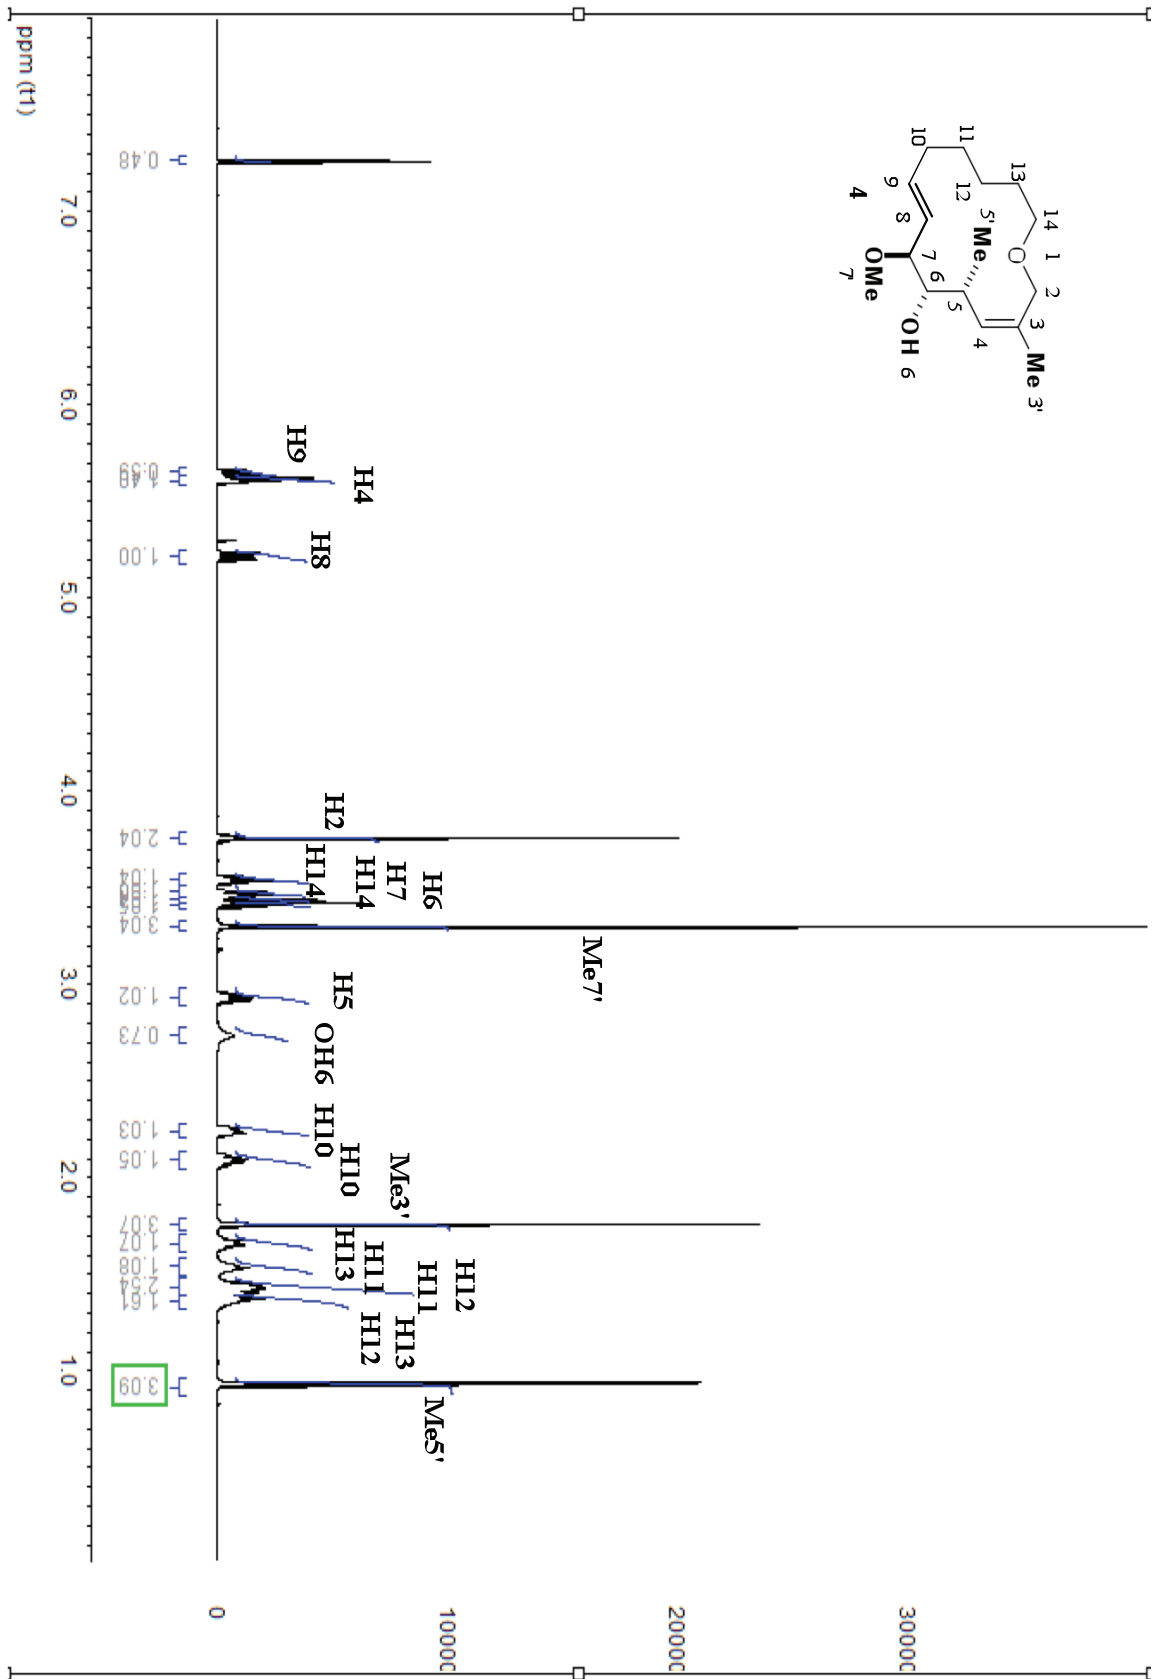



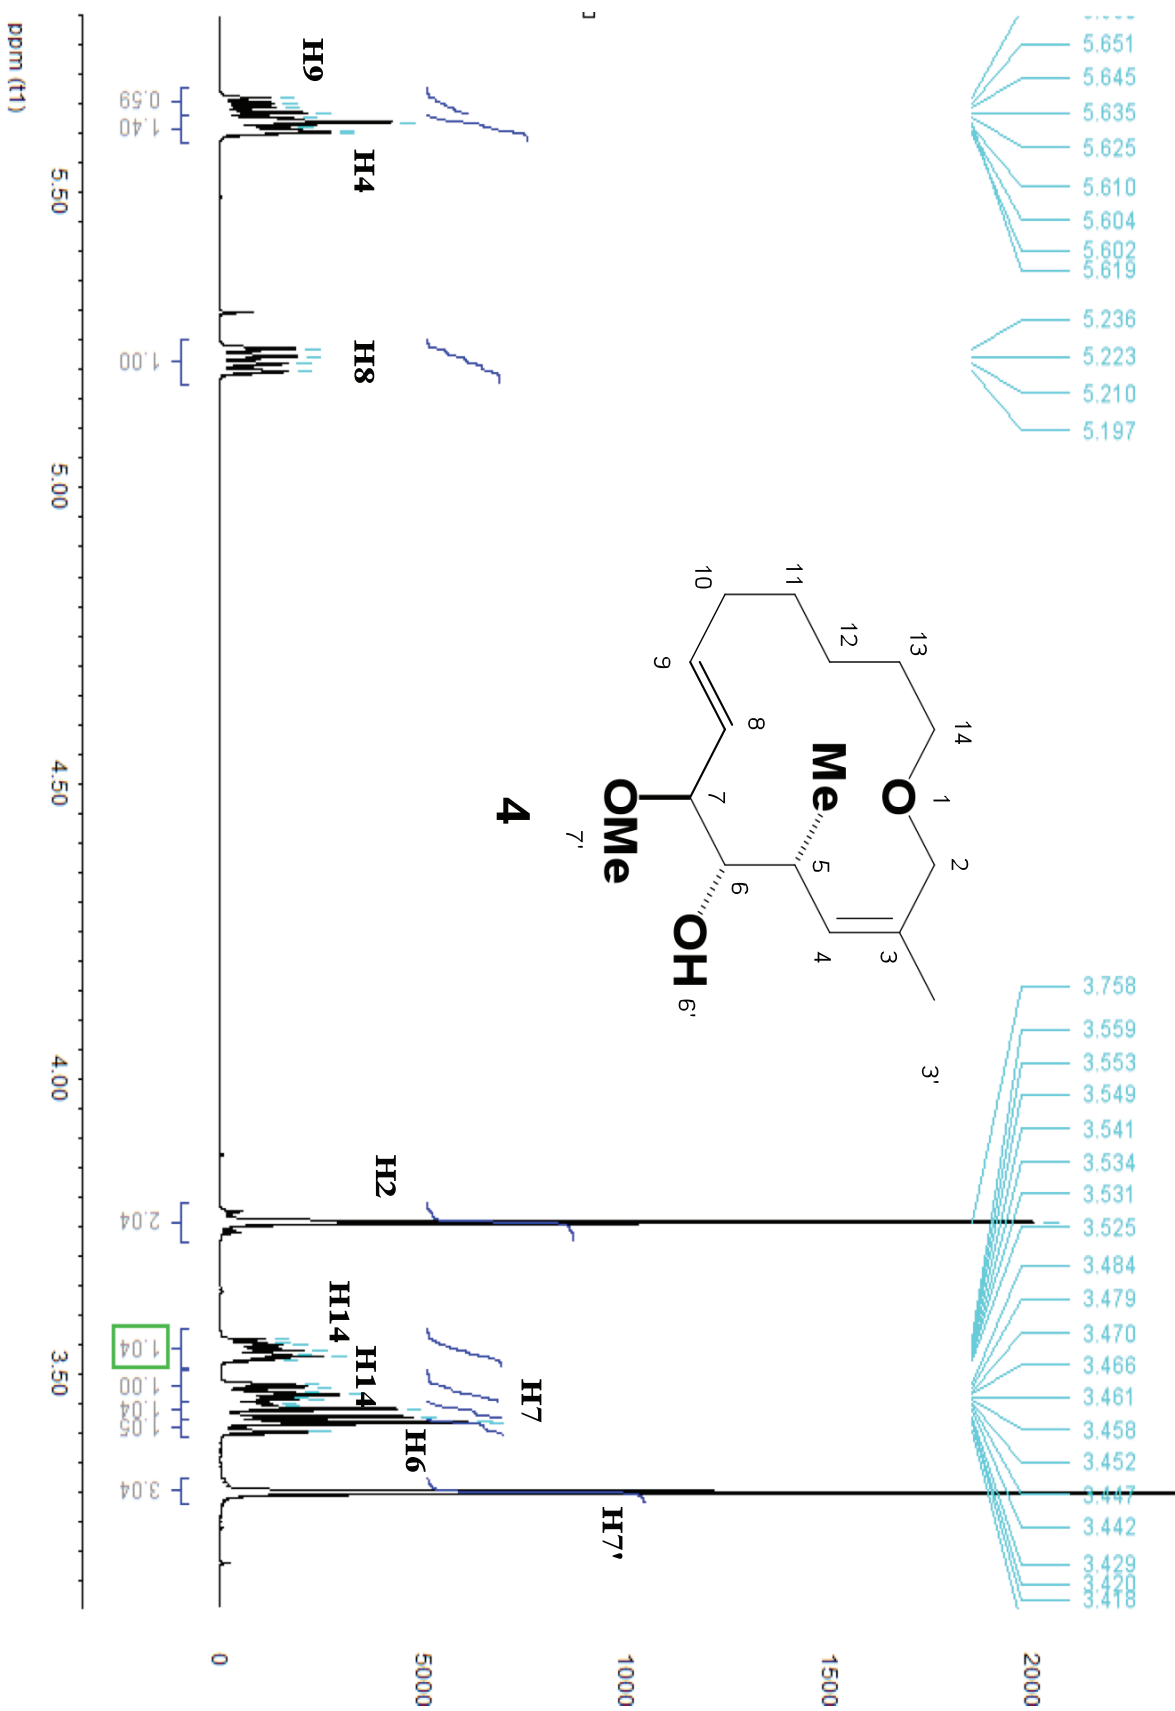

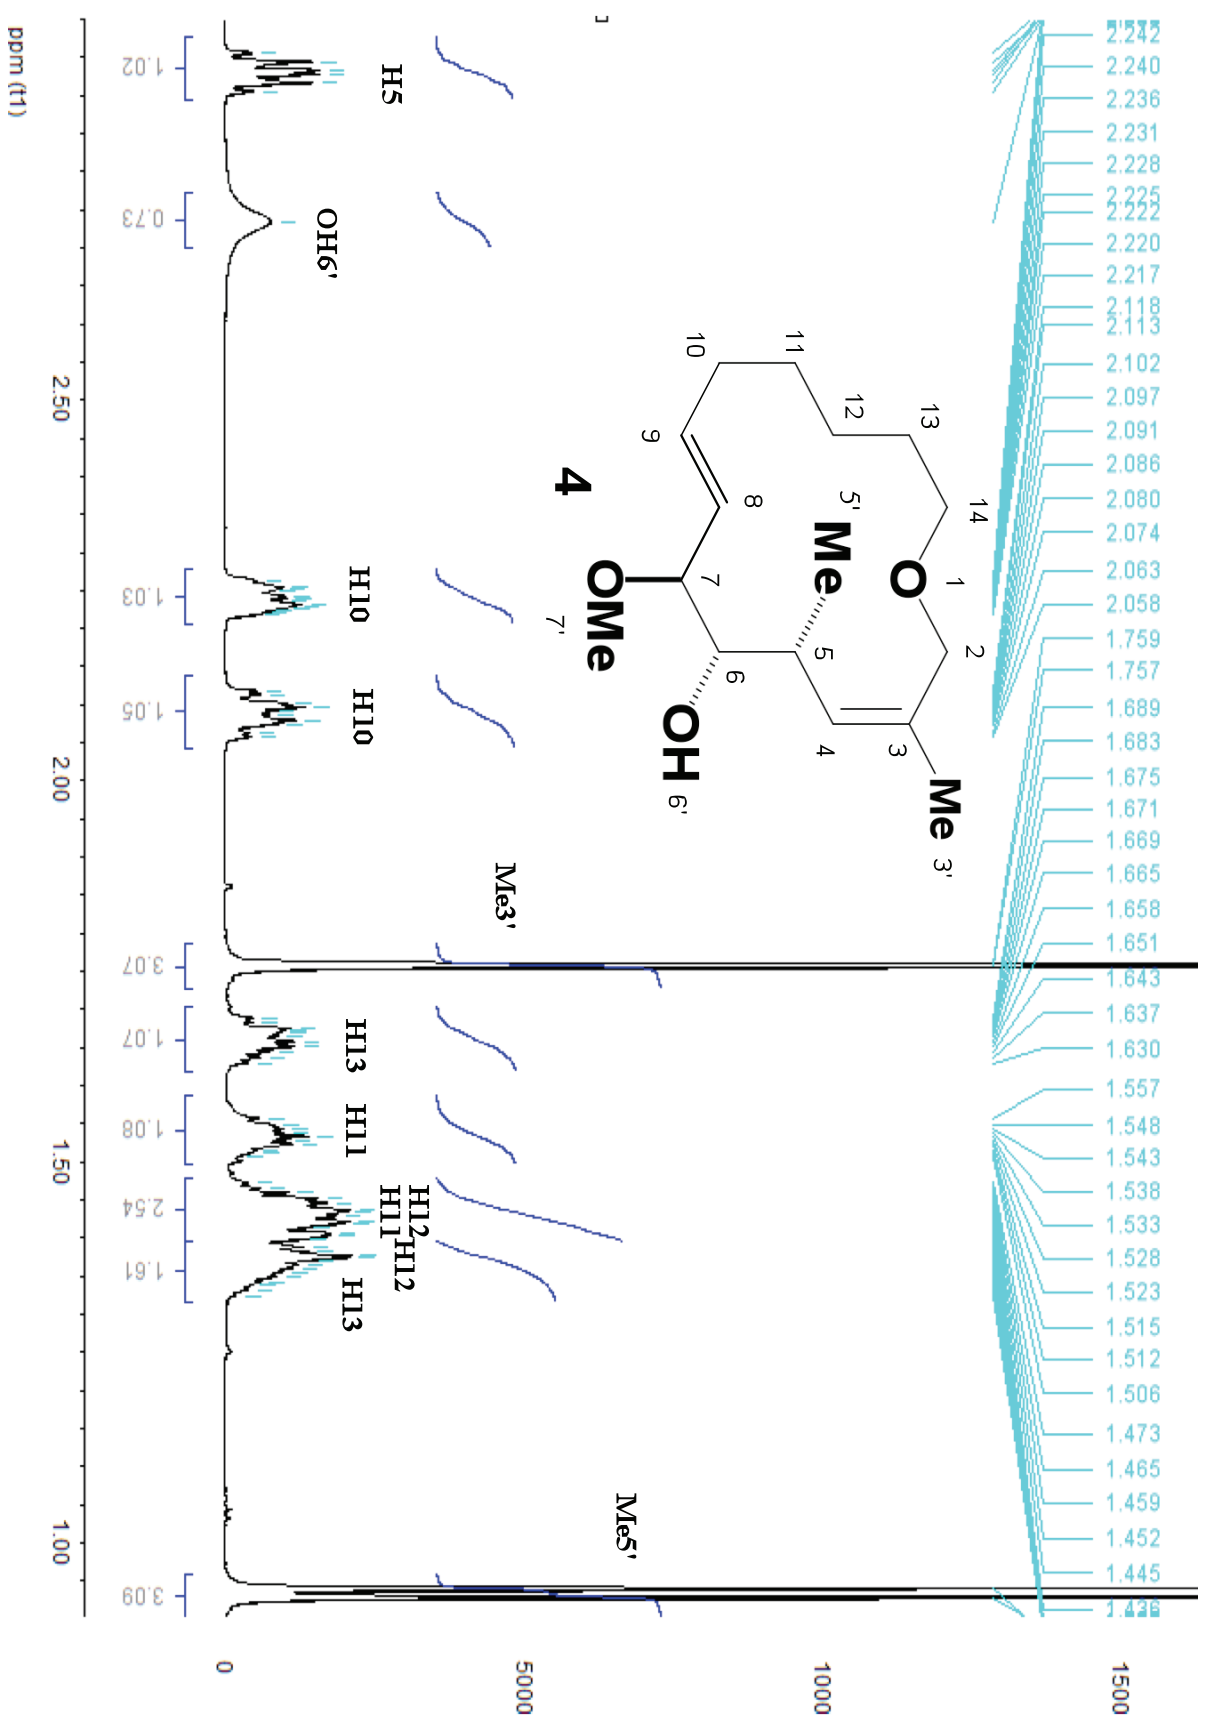

astatin\_Ether (11 1) CDCl3 24.0C April\_16,2010\_10:25:40 Bruker AVIII 600MHz RRL1326: janggeum cosygpqf

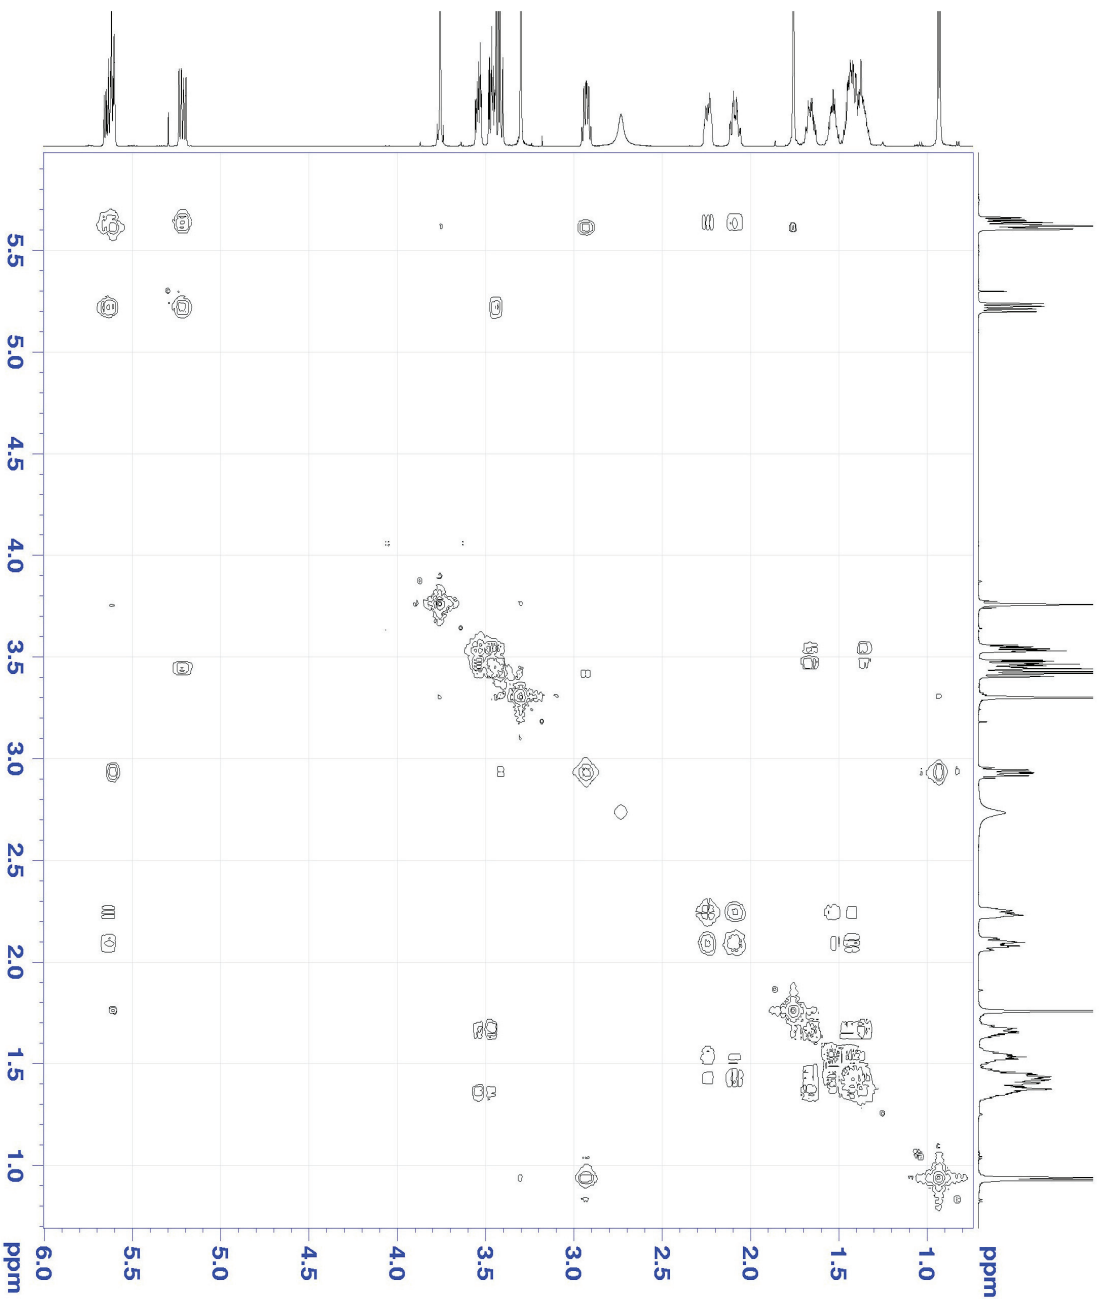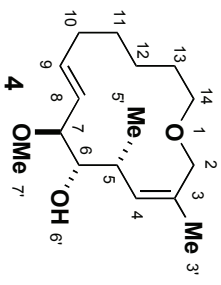

```

NAME          Ml griseatinin_Ether
EXPNO         11
PROCNO        1
Date_         20100416
Time          10.26
INSTRUM       spect
PROBHD        5 mm PABYX
PULPROG       cosygpqf
TD            2048
SOLVENT       CDCl3
DS            16
SWH           4545.455 Hz
FIDRES        2.219460 Hz
RG            0.42539264
DE            110.000 usec
TE            29.00 usec
D0            0.00000300 sec
D1            1.38940704 sec
D12           0.00000400 sec
D13           0.00000400 sec
IN0           0.00022000 sec

----- CHANNEL f1 -----
NUC1          1H
P1            14.00 usec
PL1           0.00 dB
PL12         21.30 dB
SFO1          600.1324788 MHz

----- GRADIENT CHANNEL -----
GPN1          10.00 %
GP21         1000.00 usec
P16           122.1
ND0
SFO1          600.1325 MHz
FIDRES        35.511364 Hz
SW            7.574 ppm
SI            1024
SF            600.1300153 MHz
WDW           SINE
GB            0.00 Hz
PC            1.40
MC2           1.00
SFO2          600.1300157 MHz
WDW           SINE
ISB            0.00 Hz
GB
  
```



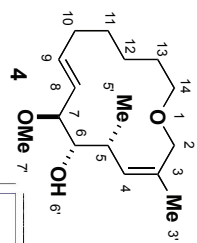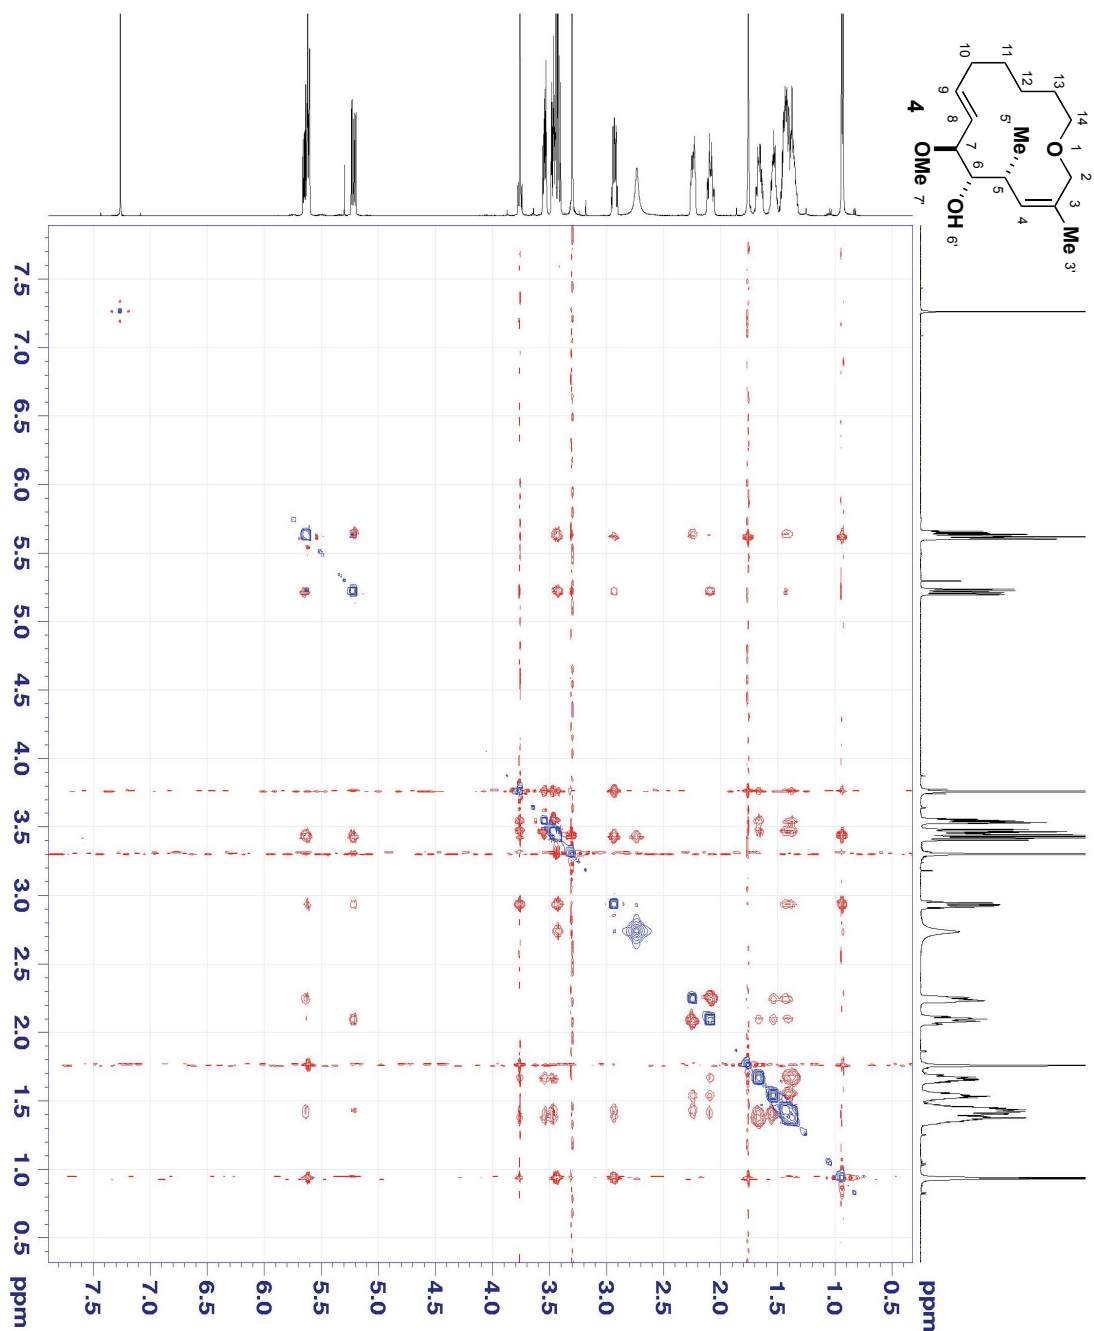

```

NAME Migrantsatin_Ether
EXPNO 12
PROCNO 1
Date_ 20100416
Time 10.38
INSTRUM spect
PROBHD 5 mm PATTXO 19F
PULPROG meesyspph
TD 2048
SOLVENT CDCl3
NS 12
DS 16
SWH 4545.455 Hz
FIDRES 2.219460 Hz
AQ 0.2253300 sec
RG 64
DW 110.000 usec
DE 6.00 usec
TE 297.1 K
D0 0.00009217 sec
D1 1.94183600 sec
D8 0.80000001 sec
D16 0.00020000 sec
IN0 0.00022000 sec

===== CHANNEL f1 =====
NUC1 1H
P1 14.00 usec
P2 28.00 usec
PL1 27.752210 W
PL2 27.752210 W
SFO1 600.1324788 MHz

===== GRADIENT CHANNEL =====
GPNAM1 SINE.100
GPNAM2 SINE.100
GPZ1 40.00 %
GPZ2 -40.00 %
P16 10000.00 usec
ND0 1
TD 256
SFO1 600.1325 MHz
FIDRES 17.755682 Hz
SW 7.574 ppm
FnmODE States-TPPI
SI 1024
SF 600.1300158 MHz
WDW QSINE
SSB 2
LB 0.40 Hz
GB 0
PC 1.00
SI 1024
MC2 States-TPPI
SF 600.1300150 MHz
WDW QSINE
SSB 2
LB 0.40 Hz
GB 0
  
```

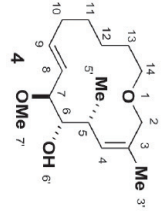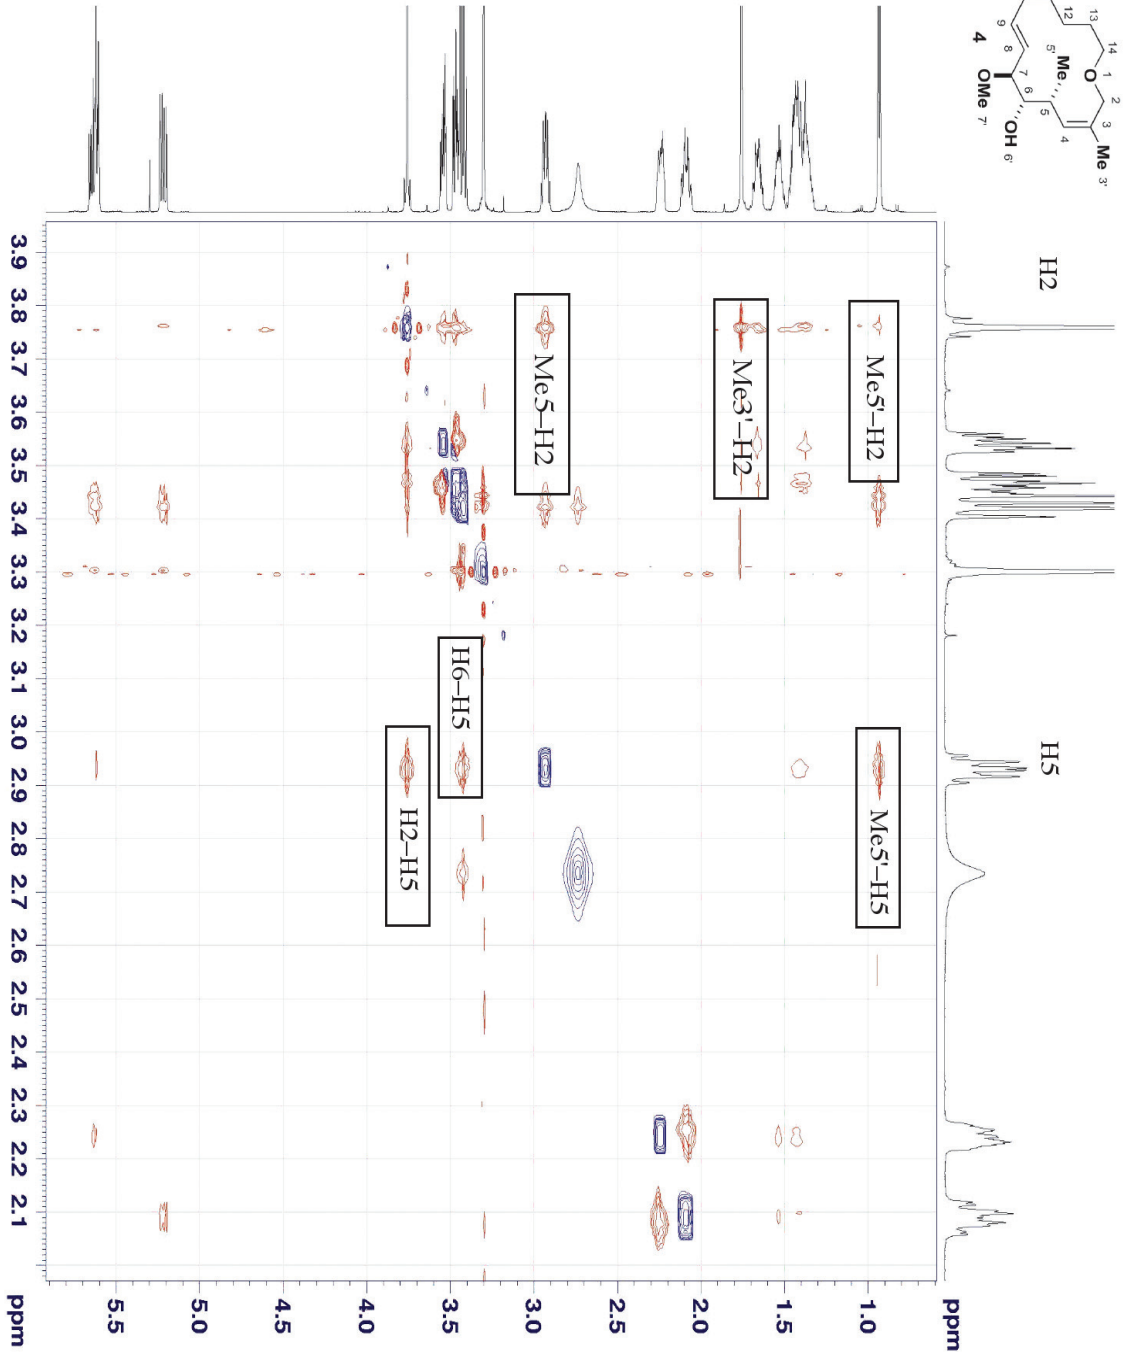

```

NAME      Migrastatin_Ether
EXPNO     1
PROCNO    1
Date_     20100416
Time      10.38
INSTRUM   spect
PROBHD    5 mm FA1XO 19F
PULPROG   hoegspph
TD         2048
SOLVENT   CDCl3
NS         12
DS         16
SWH        4545.455 Hz
FIDRES     2.219460 Hz
AQ         0.2253300 sec
RG         64
DE         110.000 usec
TE         6.00 usec
D1         297.11 K
D16        0.00009217 sec
D8         1.34183600 sec
D16        0.80000001 sec
IN0        0.00022000 sec

===== CHANNEL f1 =====
NUC1       1H
P1         14.00 usec
P2         28.00 usec
PL1        1.50 dB
PL12       27.78522110 W
SFO1       600.1324788 MHz

===== GRADIENT CHANNEL:
GPNAM1    SINE.100
GPNAM2    SINE.100
GRZ1      40.00 %
GRZ2      40.00 %
P16       1000.000 usec
ND0
TD         256
SFO1       600.1325 MHz
FIDRES     17.755682 Hz
SW         7.574 ppp
EMODE      States-TPPI
SI         1024
SF         600.1300158 MHz
WDW        OSINE
SSB        2
GB         0.00 Hz
PC         1.00
SI         1024
MFC2      States-TPPI
SF         600.1300150 MHz
WDW        OSINE
SSB        2
LB         0.00 Hz
GB         0

```

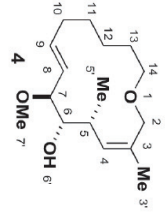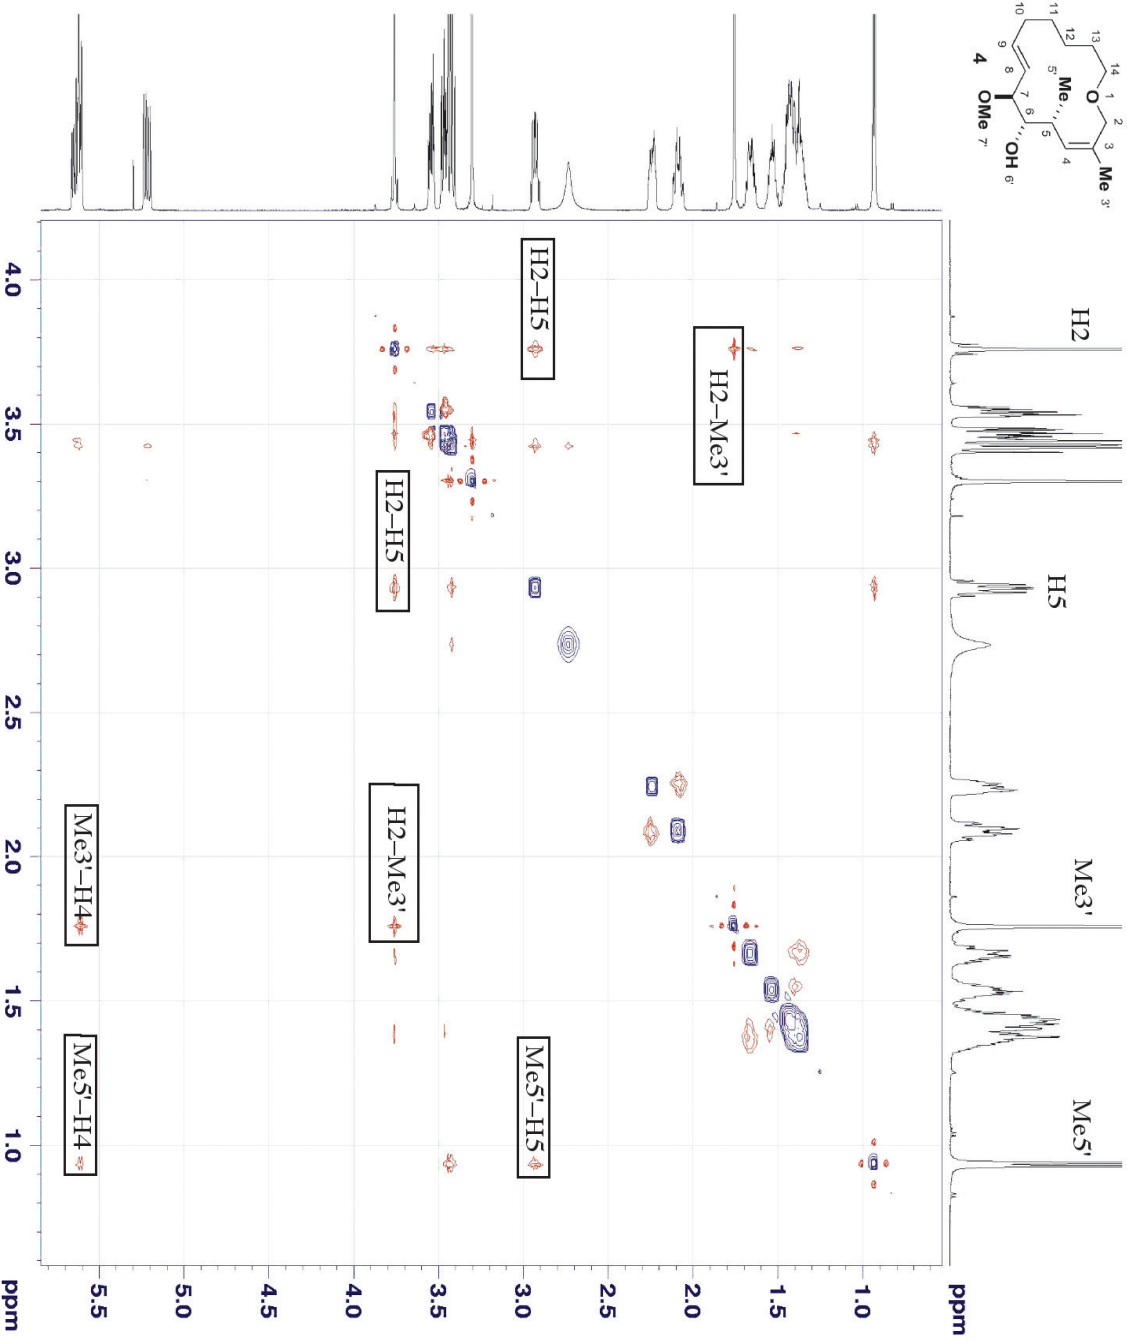

```

NAME Mifegrastatin_Ether
EXPNO 12
PROCNO 1
Date_ 20100416
Time 10.38
INSTRUM spect
PROBHD 5 mm PATTXO 19F
PULPROG noesygpph
TD 2048
SOLVENT CDCl3
NS 12
DS 16
SWH 4545.455 Hz
FIDRES 2.219460 Hz
AQ 0.2253300 sec
RG 64
DW 110.000 usec
DE 6.00 usec
TE 297.1 K
D0 0.00000217 sec
D1 1.94183600 sec
D8 0.800000001 sec
D16 0.00022000 sec
IN0 0.00022000 sec

===== CHANNEL f1 =====
NUC1 1H
P1 14.00 usec
P2 28.00 usec
PL1 -1.30 dB
PL1W 27.78522110 W
SFO1 600.1324788 MHz

===== GRADIENT CHANNEL =====
GPNAM1 SINE.100
GPNAM2 SINE.100
GPZ1 40.00 %
GPZ2 -40.00 %
PI6 1000.00 usec
ND0 1
TD 256
SFO1 600.1325 MHz
FIDRES 17.755682 Hz
SW 7.574 ppm
FMODE States-TPPI
SI 1024
SF 600.1300158 MHz
WDW OSINE
SSB 2
LB 0.00 Hz
PC 1.00
SI 1024
MC2 States-TPPI
SF 600.1300150 MHz
WDW OSINE
SSB 2
LB 0.00 Hz
GB 0
  
```

1D NOE data extracted from 2D NOESY spectrum of Migrastatin Ether (4) recorded in chloroform.  
Correlations for Me3

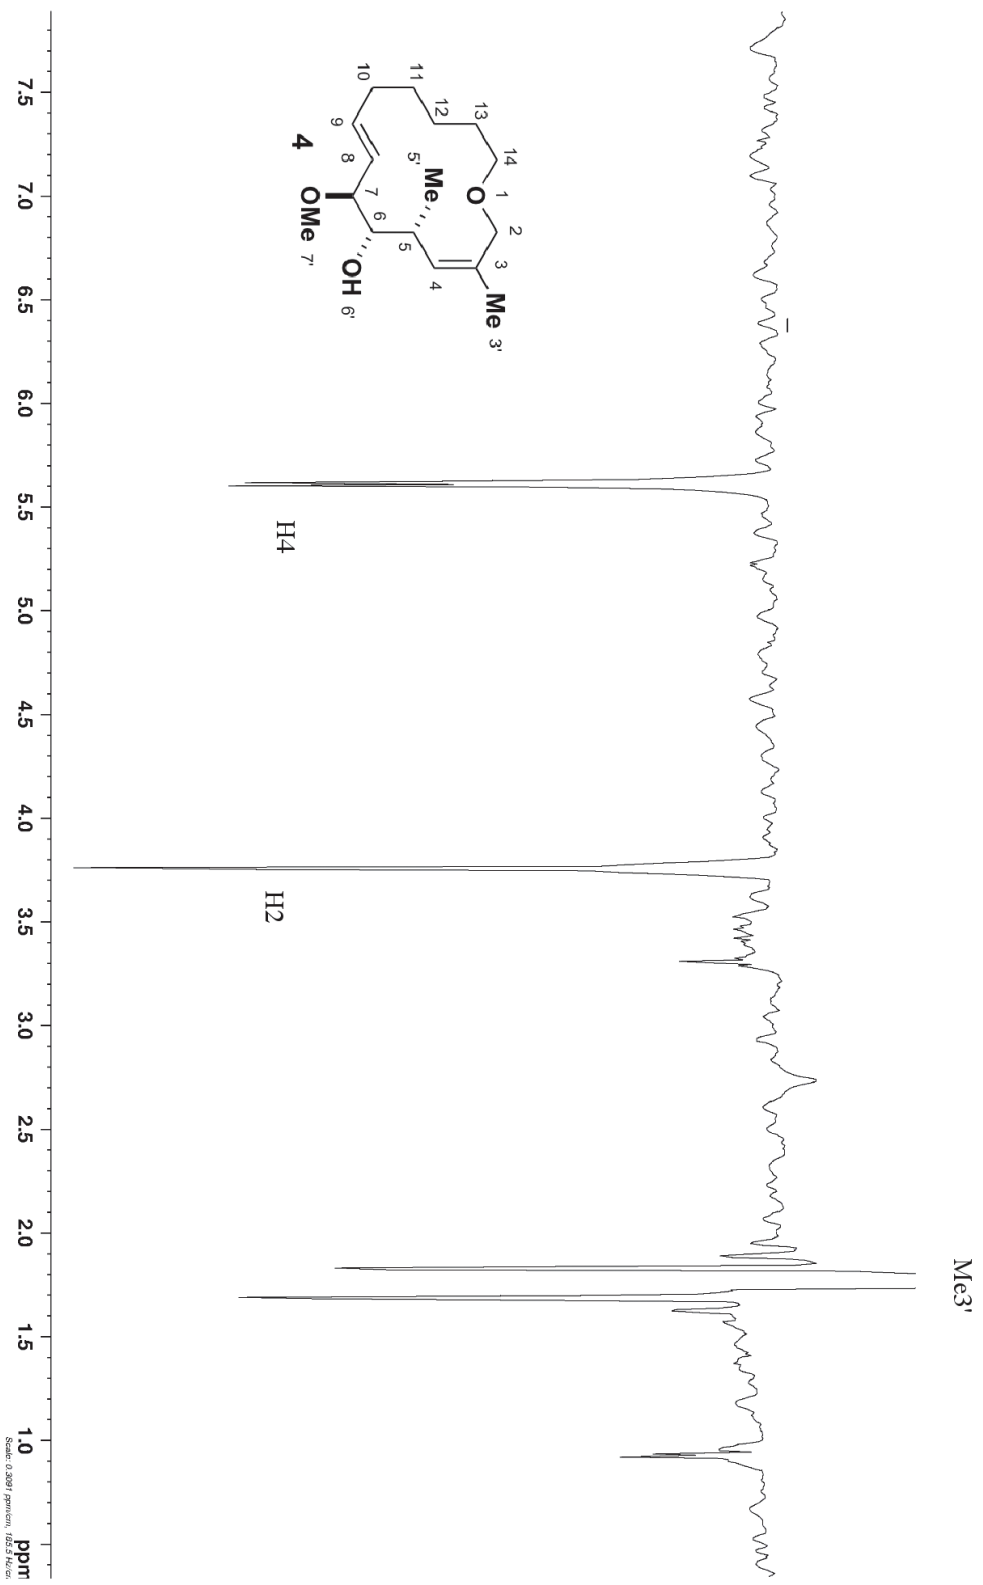



1D NOE data extracted from 2D NOESY spectrum of Migrastatin Ketone (4) recorded in chloroform.  
Correlations for H2 protons.

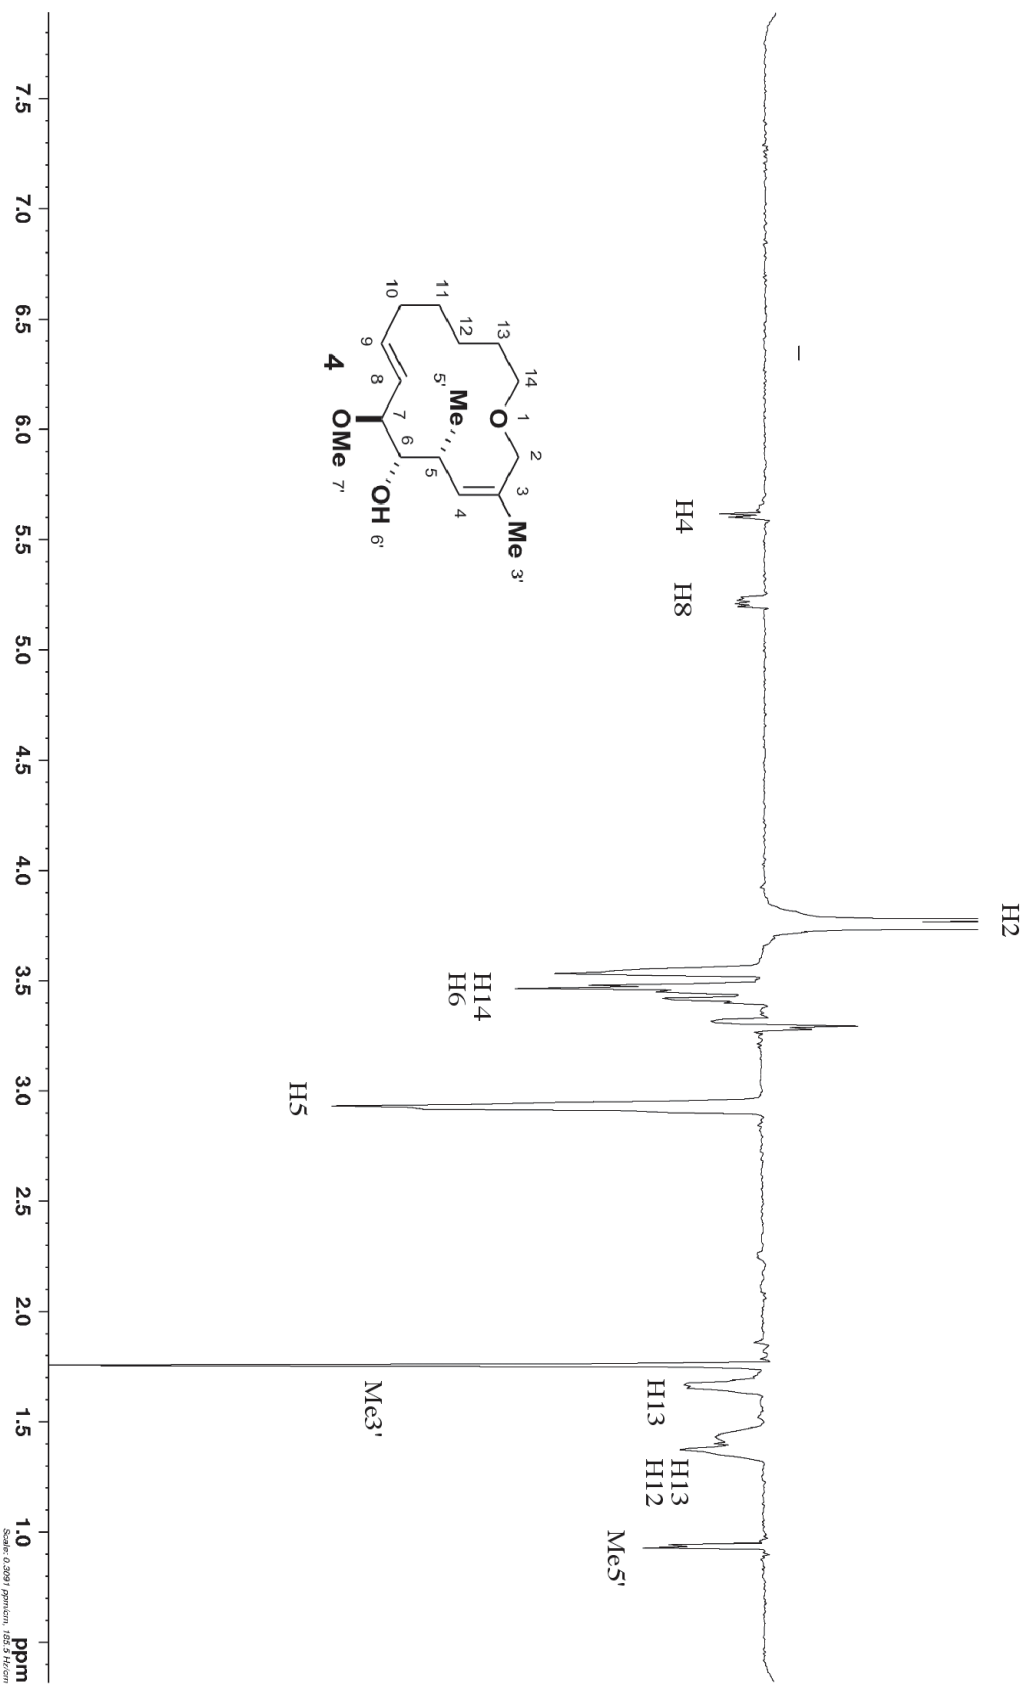

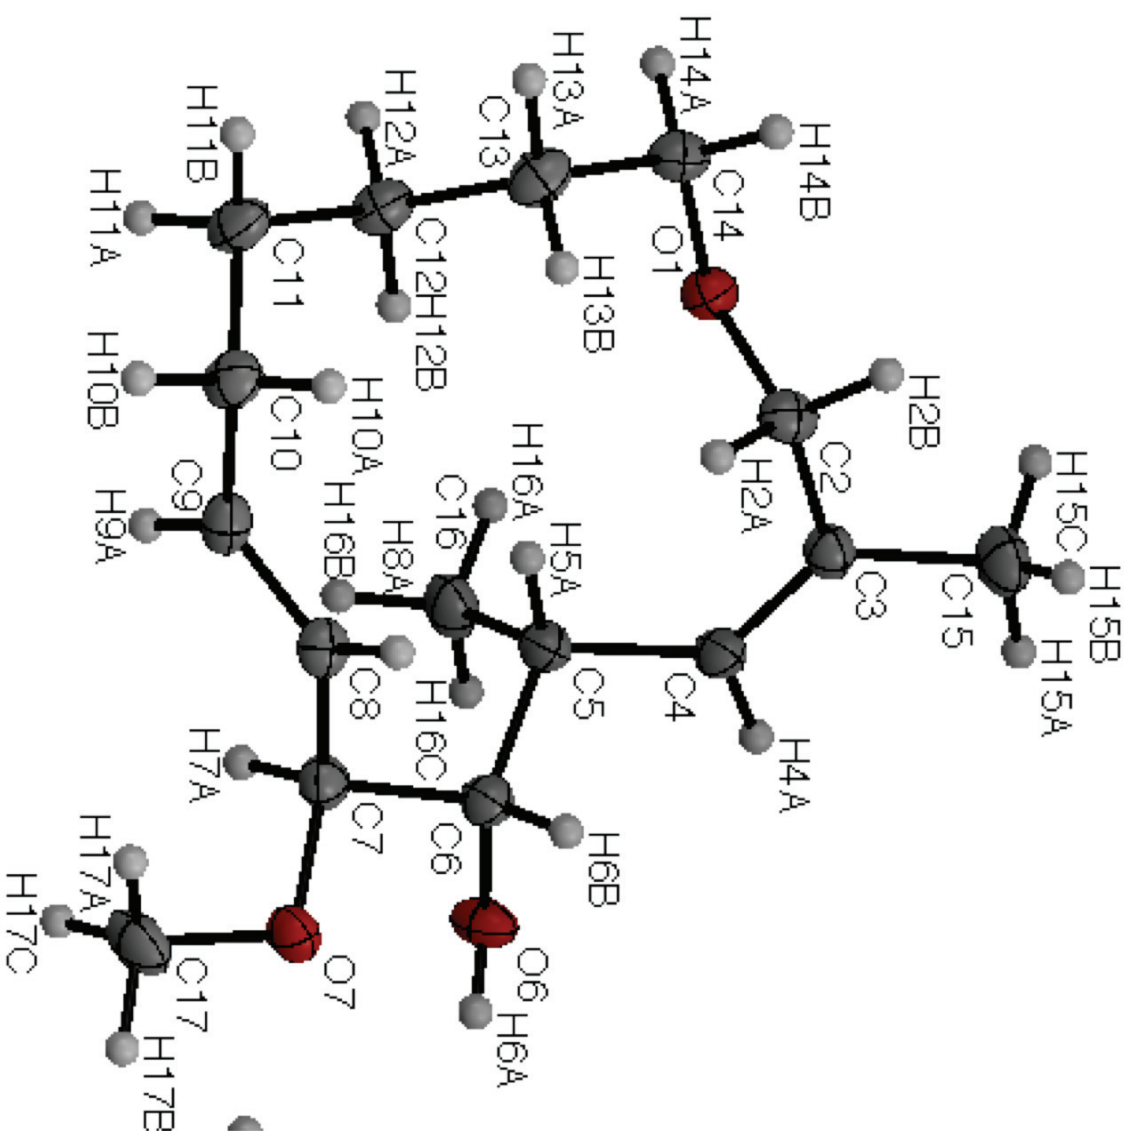

**Single-Crystal X-ray Diffraction.** The intensity data for **I** were measured on a Bruker-Nonius KappaCCD diffractometer (graphite-monochromated Mo  $K\alpha$  radiation,  $\lambda = 0.71073$  Å,  $\phi$ - $\omega$  scans) at 100 (1) K. The data were not corrected for absorption. Details of the solution and refinements for this compound are presented below:

**C<sub>16</sub>H<sub>28</sub>O<sub>3</sub> (I):** The crystal of **I**, with approximate dimensions 0.050 x 0.10 x 0.36 mm, were monoclinic with space group  $P2_1$ . The final unit-cell constants of **I** were  $a = 9.069(2)$ ,  $b = 11.990(2)$ ,  $c = 14.787(3)$  Å,  $\beta = 94.81(3)^\circ$ ,  $V = 1602.2(6)$  Å<sup>3</sup>,  $Z = 4$ ,  $\rho = 1.113$  g cm<sup>-3</sup>,  $\mu = 0.075$  mm<sup>-1</sup>, formula weight = 268.38. The structure of **I** was solved with SHELXS-97 and refined by full-matrix least squares on  $F^2$  with SHELXL-97. The unit cell of **I** contains two independent molecules. The hydrogen atoms were included in the structure-factor calculations, but their parameters were not refined. The final discrepancy indices for the 4874 reflections ( $\theta < 30.04^\circ$ ) were  $R = 0.0612$  (calculated on  $F$ ) and  $R_w = 0.1143$  (calculated on  $F^2$ ) with 352 parameters varied. The final difference map peaks are  $< 0.25$  e Å<sup>-3</sup>.

**Table 1. Thermal Parameters (U's) for PN-V-ME at 100 K**

| Atom | U11/U    | U22      | U33      | U12        | U13       | U23       |
|------|----------|----------|----------|------------|-----------|-----------|
| O1   | 0.023(1) | 0.024(1) | 0.021(1) | -0.0013(9) | 0.0012(9) | 0.0001(9) |
| O6   | 0.024(1) | 0.026(1) | 0.027(1) | -0.0038(9) | -0.006(1) | 0.0077(9) |
| O7   | 0.030(1) | 0.019(1) | 0.027(1) | -0.0022(9) | 0.000(1)  | 0.0018(9) |
| C2   | 0.020(2) | 0.028(2) | 0.023(2) | 0.003(1)   | 0.003(1)  | 0.002(1)  |
| C3   | 0.025(2) | 0.019(1) | 0.023(2) | -0.001(1)  | 0.004(1)  | -0.000(1) |
| C4   | 0.025(2) | 0.020(1) | 0.022(2) | -0.003(1)  | -0.004(1) | 0.000(1)  |
| C5   | 0.029(2) | 0.020(1) | 0.023(2) | 0.001(1)   | -0.004(1) | 0.001(1)  |
| C6   | 0.023(2) | 0.021(1) | 0.023(2) | -0.001(1)  | -0.002(1) | 0.000(1)  |

|      |          |          |          |           |           |            |
|------|----------|----------|----------|-----------|-----------|------------|
| C7   | 0.024(2) | 0.020(1) | 0.023(2) | 0.001(1)  | 0.004(1)  | -0.002(1)  |
| C8   | 0.020(2) | 0.023(1) | 0.025(2) | -0.001(1) | 0.004(1)  | -0.002(1)  |
| C9   | 0.027(2) | 0.021(1) | 0.027(2) | -0.002(1) | 0.006(1)  | -0.004(1)  |
| C10  | 0.027(2) | 0.027(2) | 0.024(2) | -0.007(1) | -0.001(1) | -0.000(1)  |
| C11  | 0.035(2) | 0.031(2) | 0.020(2) | -0.009(1) | -0.001(1) | -0.000(1)  |
| C12  | 0.025(2) | 0.031(2) | 0.020(2) | -0.004(1) | 0.001(1)  | -0.000(1)  |
| C13  | 0.023(2) | 0.035(2) | 0.024(2) | -0.004(1) | -0.000(1) | -0.003(1)  |
| C14  | 0.024(2) | 0.027(2) | 0.022(2) | 0.002(1)  | -0.000(1) | 0.003(1)   |
| C15  | 0.034(2) | 0.021(2) | 0.039(2) | -0.004(1) | 0.001(2)  | -0.004(1)  |
| C16  | 0.049(2) | 0.019(2) | 0.031(2) | -0.000(1) | 0.012(2)  | 0.002(1)   |
| C17  | 0.038(2) | 0.019(2) | 0.046(2) | -0.003(1) | -0.006(2) | 0.006(2)   |
| O1'  | 0.019(1) | 0.024(1) | 0.023(1) | 0.0011(9) | 0.0003(9) | -0.0019(9) |
| O6'  | 0.032(1) | 0.028(1) | 0.020(1) | 0.010(1)  | -0.005(1) | -0.0025(9) |
| O7'  | 0.025(1) | 0.018(1) | 0.025(1) | 0.0022(9) | -0.000(1) | -0.0016(8) |
| C2'  | 0.024(2) | 0.025(2) | 0.022(2) | 0.004(1)  | 0.005(1)  | 0.001(1)   |
| C3'  | 0.018(1) | 0.020(1) | 0.027(2) | 0.001(1)  | 0.002(1)  | -0.004(1)  |
| C4'  | 0.025(2) | 0.020(1) | 0.021(2) | 0.001(1)  | -0.002(1) | -0.003(1)  |
| C5'  | 0.026(2) | 0.019(1) | 0.021(2) | -0.000(1) | -0.003(1) | -0.001(1)  |
| C6'  | 0.021(2) | 0.021(1) | 0.021(2) | 0.003(1)  | 0.001(1)  | -0.001(1)  |
| C7'  | 0.020(2) | 0.020(1) | 0.022(2) | 0.001(1)  | -0.000(1) | -0.001(1)  |
| C8'  | 0.024(2) | 0.019(1) | 0.021(2) | -0.000(1) | 0.003(1)  | -0.001(1)  |
| C9'  | 0.023(2) | 0.022(1) | 0.020(2) | -0.000(1) | 0.003(1)  | -0.003(1)  |
| C10' | 0.026(2) | 0.026(2) | 0.023(2) | 0.001(1)  | -0.001(1) | -0.004(1)  |
| C11' | 0.025(2) | 0.026(2) | 0.024(2) | -0.002(1) | -0.002(1) | -0.002(1)  |
| C12' | 0.022(2) | 0.024(1) | 0.022(2) | 0.001(1)  | 0.002(1)  | -0.000(1)  |
| C13' | 0.025(2) | 0.029(2) | 0.022(2) | 0.001(1)  | 0.004(1)  | -0.002(1)  |
| C14' | 0.027(2) | 0.025(2) | 0.022(2) | 0.003(1)  | 0.001(1)  | 0.001(1)   |
| C15' | 0.029(2) | 0.023(2) | 0.031(2) | -0.001(1) | 0.006(1)  | -0.001(1)  |
| C16' | 0.024(2) | 0.023(2) | 0.039(2) | 0.001(1)  | -0.003(2) | 0.000(1)   |
| C17' | 0.033(2) | 0.021(2) | 0.028(2) | 0.004(1)  | 0.004(2)  | -0.001(1)  |

Table 2. Coordinates for PN-V-ME at 100 K

| Atom | X         | Y         | Z          |
|------|-----------|-----------|------------|
| O1   | 0.3376(2) | 0.6858(2) | -0.0009(1) |
| O6   | 0.6182(2) | 0.3782(2) | 0.2478(2)  |
| O7   | 0.3993(2) | 0.2136(2) | 0.2296(1)  |

|     |           |            |            |
|-----|-----------|------------|------------|
| C2  | 0.2927(3) | 0.6848(3)  | 0.0890(2)  |
| C3  | 0.4270(3) | 0.6893(2)  | 0.1567(2)  |
| C4  | 0.5152(4) | 0.6015(2)  | 0.1741(2)  |
| C5  | 0.4972(4) | 0.4894(2)  | 0.1288(2)  |
| C6  | 0.4790(4) | 0.3965(2)  | 0.1984(2)  |
| C7  | 0.4182(3) | 0.2882(2)  | 0.1544(2)  |
| C8  | 0.2763(3) | 0.3081(2)  | 0.0980(2)  |
| C9  | 0.2545(4) | 0.2855(2)  | 0.0100(2)  |
| C10 | 0.1188(4) | 0.3142(3)  | -0.0501(2) |
| C11 | 0.1561(4) | 0.3777(3)  | -0.1350(2) |
| C12 | 0.2341(4) | 0.4894(3)  | -0.1168(2) |
| C13 | 0.1337(4) | 0.5809(3)  | -0.0831(2) |
| C14 | 0.2144(4) | 0.6911(3)  | -0.0681(2) |
| C15 | 0.4550(4) | 0.8011(2)  | 0.2021(2)  |
| C16 | 0.6265(4) | 0.4676(3)  | 0.0705(2)  |
| C17 | 0.3535(4) | 0.1043(3)  | 0.2003(3)  |
| O1  | 0.9337(2) | -0.1786(2) | 0.5993(1)  |
| O6  | 0.6710(3) | 0.1122(2)  | 0.3162(1)  |
| O7  | 0.6108(2) | 0.2859(2)  | 0.4298(1)  |
| O2  | 0.7784(4) | -0.1616(3) | 0.5778(2)  |
| O3  | 0.7428(3) | -0.1828(2) | 0.4774(2)  |
| O4  | 0.7580(3) | -0.1041(2) | 0.4154(2)  |
| O5  | 0.8149(3) | 0.0124(2)  | 0.4332(2)  |
| O6  | 0.6936(4) | 0.1002(2)  | 0.4123(2)  |
| O7  | 0.7317(3) | 0.2117(2)  | 0.4590(2)  |
| O8  | 0.7492(3) | 0.1985(2)  | 0.5601(2)  |
| O9  | 0.8729(4) | 0.2222(2)  | 0.6099(2)  |
| O10 | 0.9022(4) | 0.2016(3)  | 0.7097(2)  |
| O11 | 1.0499(4) | 0.1423(2)  | 0.7328(2)  |
| O12 | 1.0610(4) | 0.0260(2)  | 0.6916(2)  |
| O13 | 0.9676(4) | -0.0600(3) | 0.7365(2)  |
| O14 | 0.9754(4) | -0.1763(3) | 0.6951(2)  |
| O15 | 0.6947(4) | -0.3003(3) | 0.4538(2)  |
| O16 | 0.9518(4) | 0.0335(3)  | 0.3818(2)  |
| O17 | 0.6310(4) | 0.3961(2)  | 0.4668(2)  |

**Table 3. Bond Distances and Bond Angles for PN-V-ME at 100 K**

|           | Bond Distance | Bond Angle     |           |
|-----------|---------------|----------------|-----------|
| 01 - C2   | 1.423(4) Å    | C2 - O1 - C14  | 112.4(2)° |
| 01 - C14  | 1.433(4) Å    |                |           |
| 06 - C6   | 1.422(4) Å    |                |           |
| 07 - C7   | 1.449(3) Å    | C7 - O7 - C17  | 112.6(2)° |
| 07 - C17  | 1.430(4) Å    |                |           |
| C2 - O1   | 1.423(4) Å    | O1 - C2 - C3   | 109.9(2)° |
| C2 - C3   | 1.511(4) Å    |                |           |
| C3 - C2   | 1.511(4) Å    | C2 - C3 - C4   | 122.4(3)° |
| C3 - C4   | 1.334(4) Å    | C2 - C3 - C15  | 115.0(2)° |
| C3 - C15  | 1.511(4) Å    | C4 - C3 - C15  | 122.6(3)° |
| C4 - C3   | 1.334(4) Å    | C3 - C4 - C5   | 125.3(3)° |
| C4 - C5   | 1.505(4) Å    |                |           |
| C5 - C4   | 1.505(4) Å    | C4 - C5 - C6   | 111.3(2)° |
| C5 - C6   | 1.535(4) Å    | C4 - C5 - C16  | 110.0(3)° |
| C5 - C16  | 1.535(5) Å    | C6 - C5 - C16  | 112.5(2)° |
| C6 - O6   | 1.422(4) Å    | O6 - C6 - C5   | 108.4(2)° |
| C6 - C5   | 1.535(4) Å    | O6 - C6 - C7   | 111.1(2)° |
| C6 - C7   | 1.534(4) Å    | C5 - C6 - C7   | 112.6(2)° |
| C7 - O7   | 1.449(3) Å    | O7 - C7 - C6   | 105.0(2)° |
| C7 - C6   | 1.534(4) Å    | O7 - C7 - C8   | 112.1(2)° |
| C7 - C8   | 1.493(4) Å    | C6 - C7 - C8   | 111.3(2)° |
| C8 - C7   | 1.493(4) Å    | C7 - C8 - C9   | 124.4(3)° |
| C8 - C9   | 1.328(4) Å    |                |           |
| C9 - C8   | 1.328(4) Å    | C8 - C9 - C10  | 125.6(3)° |
| C9 - C10  | 1.496(5) Å    |                |           |
| C10 - C9  | 1.496(5) Å    | C9 - C10 - C11 | 112.0(3)° |
| C10 - C11 | 1.530(4) Å    |                |           |

|            |            |                  |           |
|------------|------------|------------------|-----------|
| C11 - C10  | 1.530(4) Å | C10 - C11 - C12  | 115.0(3)° |
| C11 - C12  | 1.528(5) Å |                  |           |
| C12 - C11  | 1.528(5) Å | C11 - C12 - C13  | 113.9(3)° |
| C12 - C13  | 1.535(5) Å |                  |           |
| C13 - C12  | 1.535(5) Å | C12 - C13 - C14  | 112.2(3)° |
| C13 - C14  | 1.518(5) Å |                  |           |
| C14 - O1   | 1.433(4) Å | O1 - C14 - C13   | 113.7(3)° |
| C14 - C13  | 1.518(5) Å |                  |           |
| C15 - C3   | 1.511(4) Å |                  |           |
| C16 - C5   | 1.535(5) Å |                  |           |
| C17 - O7   | 1.430(4) Å |                  |           |
| O1' - C2'  | 1.432(4) Å | C2' - O1' - C14' | 112.9(2)° |
| O1' - C14' | 1.435(4) Å |                  |           |
| O6' - C6'  | 1.427(4) Å |                  |           |
| O7' - C7'  | 1.449(3) Å | C7' - O7' - C17' | 112.5(2)° |
| O7' - C17' | 1.436(3) Å |                  |           |
| C2' - O1'  | 1.432(4) Å | O1' - C2' - C3'  | 108.6(2)° |
| C2' - C3'  | 1.514(4) Å |                  |           |
| C3' - C2'  | 1.514(4) Å | C2' - C3' - C4'  | 122.0(2)° |
| C3' - C4'  | 1.331(4) Å | C2' - C3' - C15' | 114.7(2)° |
| C3' - C15' | 1.507(4) Å | C4' - C3' - C15' | 123.2(3)° |
| C4' - C3'  | 1.331(4) Å | C3' - C4' - C5'  | 126.3(3)° |
| C4' - C5'  | 1.505(3) Å |                  |           |
| C5' - C4'  | 1.505(3) Å | C4' - C5' - C6'  | 111.8(2)° |
| C5' - C6'  | 1.535(4) Å | C4' - C5' - C16' | 110.3(2)° |
| C5' - C16' | 1.530(4) Å | C6' - C5' - C16' | 112.6(2)° |
| C6' - O6'  | 1.427(4) Å | O6' - C6' - C5'  | 108.1(2)° |
| C6' - C5'  | 1.535(4) Å | O6' - C6' - C7'  | 111.7(2)° |
| C6' - C7'  | 1.531(4) Å | C5' - C6' - C7'  | 112.2(2)° |

|             |            |                    |           |
|-------------|------------|--------------------|-----------|
| C7' - 07'   | 1.449(3) Å | 07' - C7' - C6'    | 105.4(2)° |
| C7' - C6'   | 1.531(4) Å | 07' - C7' - C8'    | 112.1(2)° |
| C7' - C8'   | 1.498(4) Å | C6' - C7' - C8'    | 111.0(2)° |
| C8' - C7'   | 1.498(4) Å | C7' - C8' - C9'    | 123.2(2)° |
| C8' - C9'   | 1.320(4) Å | C8' - C9' - C10'   | 125.9(3)° |
| C9' - C8'   | 1.320(4) Å | C9' - C10' - C11'  | 112.1(3)° |
| C9' - C10'  | 1.498(4) Å | C10' - C11' - C12' | 114.9(3)° |
| C10' - C9'  | 1.498(4) Å | C11' - C12' - C13' | 112.7(3)° |
| C10' - C11' | 1.530(5) Å | C12' - C13' - C14' | 113.4(3)° |
| C11' - C10' | 1.530(5) Å | O1' - C14' - C13'  | 113.3(3)° |
| C11' - C12' | 1.528(4) Å |                    |           |
| C12' - C11' | 1.528(4) Å |                    |           |
| C12' - C13' | 1.522(4) Å |                    |           |
| C13' - C12' | 1.527(5) Å |                    |           |
| C13' - C14' | 1.435(4) Å |                    |           |
| C14' - O1'  | 1.527(5) Å |                    |           |
| C14' - C13' | 1.507(4) Å |                    |           |
| C15' - C3'  | 1.530(4) Å |                    |           |
| C16' - C5'  | 1.436(3) Å |                    |           |
| C17' - 07'  |            |                    |           |
